1 **Identifying developmentally important genes with single-cell RNA-seq from an**  
2 **embryo**

3

4 Garth R. Ilsley<sup>1,5,\*</sup>, Ritsuko Suyama<sup>1,5</sup>, Takeshi Noda<sup>1,4</sup>, Nori Satoh<sup>1</sup>, Nicholas M. Luscombe<sup>1,2,3,\*</sup>

5

6 <sup>1</sup> Okinawa Institute of Science and Technology Graduate University, Onna, Okinawa 904-0495, Japan

7 <sup>2</sup> The Francis Crick Institute, 1 Midland Road, London, NW1 1AT, UK

8 <sup>3</sup> UCL Genetics Institute, University College London, Gower Street, London WC1E 6BT, UK

9 <sup>4</sup> Current address: Shinshu University, Matsumoto, Nagano Prefecture, 390-8621, Japan

10 <sup>5</sup> These authors contributed equally to this work.

11 \* Correspondence should be address to [garth.ilsley@oist.jp](mailto:garth.ilsley@oist.jp) or [nicholas.luscombe@oist.jp](mailto:nicholas.luscombe@oist.jp).

12 **Gene expression studies have typically focused on finding differentially expressed**  
13 **genes or pathways between two or more conditions. More recently, single-cell**  
14 **RNA-seq has been established as a reliable and accessible technique enabling new**  
15 **types of analyses, such as the study of gene expression variation within cell types**  
16 **from cell lines or from relatively similar cells in tissues, organs or tumors.**  
17 **However, although single-cell RNA-seq provides quantitative and comprehensive**  
18 **expression data in a developing embryo, it is not yet clear whether this can**  
19 **replace conventional in situ screens for finding developmentally important genes;**  
20 **moreover, current single-cell data analysis approaches typically cluster cells into**  
21 **types based on a common set of genes or identify more variable or differentially**  
22 **expressed genes using predefined groups of cells, limiting their use for finding**  
23 **genes with novel expression patterns. Here we present a method that**  
24 **comprehensively finds cell-specific patterns of developmentally important**  
25 **regulators directly from single-cell gene expression data of the *Ciona* embryo, a**  
26 **marine chordate. We recover many of the known expression patterns directly**  
27 **from our single-cell RNA-seq data and despite extensive previous screens, we**  
28 **succeed in finding new cell-specific patterns and genes, which we validate by**  
29 **in situ and single-cell qPCR.**

30 One early application of single-cell sequencing has been the study of gene  
31 expression variation within cell types such as from cell lines or from relatively similar  
32 cells in tissues, organs or tumors<sup>1-7</sup>, an analysis not possible with bulk RNA-seq where  
33 expression is averaged over thousands of cells. Single-cell data has enabled finer  
34 resolution approaches: apparently homogenous groups of cells can be clustered to  
35 identify novel and rare subtypes<sup>8-11</sup>. Cells undergoing differentiation at different rates

36 can be ordered and grouped and cell-to-cell variation underlying differentiation  
37 decisions can be studied<sup>12-15</sup>.

38 A further distinct application for single-cell sequencing is to probe the very  
39 different and changing (nonterminal) cell types of developing embryos<sup>3,16-22</sup>. An  
40 important goal in developmental biology is to identify the relatively few genes  
41 controlling the course of development. They are expressed in various, overlapping  
42 subsets of cell types and it is the combination of these that gives rise to the multiplicity  
43 of cell types. Ideally, we would like to find these key genes and the subsets of cells (the  
44 patterns) they are expressed in. However, since these subsets are not known a priori,  
45 finding cell-specific patterns from differential expression analysis requires many  
46 pairwise comparisons between different groupings of cell types, leading to many false  
47 positives from multiple testing. In the eight cells we are considering (the right half of the  
48 16-cell embryo), there are 127 pairwise comparisons required: specifically, there are  
49 eight possible comparisons for one cell type against seven; 28 comparisons for two cell  
50 types against six and so on. At the 32-cell stage, more than 2 billion comparisons would  
51 be required. Moreover, the increased number of false positives does not result in many  
52 true positives since most of the pairwise comparisons do not correspond to future  
53 lineage or cell fate decisions, and when they do, only a few key genes will be specifically  
54 expressed. Hence, the methods to date have focused on comparisons between a few  
55 embryo stages or lineages, or have looked for genes that express more heterogeneously  
56 within the early (2- or 4-cell) stages of the embryo<sup>16,17</sup>.

57 Cell clustering approaches don't address this problem either. If cells are clustered  
58 based on the expression of either all genes or the most variable genes, cells from the  
59 same embryo, development stage or batch tend to cluster together<sup>3,11,17,21,23</sup> (Figure 1a-b

60 for our data). Clustering can be more informative regarding cell types if a subset of  
61 genes is used, but again the relevant gene subsets vary depending on the cell types being  
62 compared. In other words, the choice of genes will predetermine what cell type  
63 differences can be resolved.

64         Given these limitations, the standard approach to finding developmentally  
65 important genes still requires extensive use of in situ hybridization assays, applied to a  
66 subset of genes selected by genomic techniques, for example, genes with sequence  
67 similarity to known developmental regulators in other animals or candidate genes from  
68 a whole-embryo differential expression analysis.

69

## 70 **A pattern discovery method**

71         To find developmentally important patterns directly from our single-cell  
72 sequencing data of *Ciona* embryos, we developed a method that can scale to many cells.  
73 *Ciona* develops according to a stereotyped or invariant lineage<sup>24–26</sup>, with zygotic  
74 expression beginning around the 8-cell stage<sup>27</sup>. This allowed us to collect precisely  
75 defined replicates of all eight cell types of the right half of the embryo at the 16-cell  
76 stage of *Ciona*, which has comprehensive in situ data and many known gene expression  
77 patterns<sup>28</sup> as well as microarray data at cellular resolution from the pooling of large  
78 numbers of single cells<sup>23</sup>.

79         First, we checked the quality of our data and produced counts for each gene with  
80 four replicates per cell type (Online methods, Figure 1c-e and Supplementary Table 3).  
81 Although other transformations are possible, our method begins with a simple  
82 transform to the counts, which has the advantage of being easy to interpret. Since our  
83 primary interest was to study how genes change between different cell types, we did not

84 normalize across genes (such as by GC content or transcript length), but only for  
85 sequencing depth by dividing by the total number of reads per sample. This gives a  
86 natural measure of expression for each gene, namely the proportion it contributes to the  
87 total, which we assume is independent of the total number of reads. The arcsine of the  
88 square root is a suitable transformation of proportions, so we use

94 
$$\varphi_i = 2 \arcsin \left( \sqrt{\frac{k_i}{N}} \right)$$

89 where  $k_i$  is the count for the  $i$ th gene and  $N$  the total number of counts ( $\sum k_i$ ). The  
90 difference between these transformed values measured in two different conditions can  
91 be interpreted as an effect size for proportions<sup>29</sup>, namely Cohen's  $h$ , but it is worth  
92 noting that a square root transformation of the proportion (or normalized count)  
93 performs equivalently.

95 Unlike general cell clustering approaches, which seek to find a classification of cell  
96 types, the first step of our method is to cluster the cells separately for every gene, which  
97 leads to putative gene expression patterns. We take the simplest approach, which is to  
98 assume that expression can be classified into two classes i.e. high and low expression. In  
99 our implementation, we use single-linkage hierarchical clustering of Euclidean distance  
100 between vectors of replicates. The resulting top-level clusters of ON and OFF then  
101 determine the relevant pairwise comparison on a per gene basis.

102 The next step in differential expression analysis is to rank genes, with the p-value  
103 being a common choice for parametric tests. Parametric tests typically require an  
104 estimate of variance for each gene that incorporates information (shrinkage) from many  
105 genes<sup>30,31</sup>. However, as discussed below, there are problems with this approach when the  
106 appropriate groups for comparison vary by gene and are not known a priori. Therefore,

107 we take a more direct approach, which does not require parameter estimation, but  
108 nevertheless ranks genes by how well the two classes (ON and OFF) separate. One  
109 approach to calculating cluster separation is to rank genes by the difference between the  
110 lowest expressing cell in the ON cluster and the highest expressing cell in the OFF  
111 cluster, but this approach is sensitive to outliers. Since we have transformed values, the  
112  $\varphi$ s, we could rank according to the difference in the mean  $\varphi$  between each cluster, but an  
113 important objective in differential expression analysis is not only to downrank  
114 ubiquitous or low expression, but also differences associated with higher variability. For  
115 these reasons, we calculate our cluster reliability score as the difference between the  
116 first quartile of the ON cluster and the third quartile of the OFF cluster, which we call the  
117 Transquartile Range (TQR). The TQR is larger when the difference in cluster means is  
118 larger, but it penalizes higher variation for a given difference in means. Further, the p-  
119 value in general is strongly affected by sample size (in this case, the number of cells  
120 being compared), whereas the TQR is relatively robust to outliers and different sample  
121 sizes, making it a suitable choice for comparisons across different patterns without  
122 requiring parameter estimation.

123

## 124 **Discovery of cell-specific gene expression patterns**

125 The dataset we generated consists of single-cell RNA-seq measurements from all  
126 eight cells of the right half of four embryos from different individuals fertilized on  
127 different days (Supplementary Table 2). We applied our method to this dataset to search  
128 comprehensively for cell-specific gene expression patterns. We selected the 40 most  
129 reliable cell-specific genes, and found these generated 12 distinct patterns (Figure 2 and  
130 Figure 4a), which include nine of the ten currently known patterns<sup>23,32-37</sup>, and 25 genes

131 with known in situ patterns. The missing pattern is for a single exemplar gene,  
132 AP-2-like2, which does not show consistent expression across embryos in one of the  
133 cells, A5.2<sup>23,35</sup>. Our result is in agreement with the average over many embryos as  
134 measured by microarray<sup>23</sup>. Thus, our approach demonstrates the power of single-cell  
135 RNA-seq surveys for finding developmentally relevant genes without extensive in situ  
136 screens, an approach which offers great potential for studying organisms that do not  
137 have the same experimental heritage as *Ciona*.

138 Out of the 12 patterns we found, the pattern with the most genes was for specific  
139 expression in the B5.2 cell type, which is also the most frequent pattern in known in situ  
140 patterns (i.e. postplasmic/PEM RNAs<sup>38</sup>). The majority of our results for B5.2 are  
141 confirmed by previous in situ datasets. Despite extensive previous screens, we identified  
142 new B5.2-specific genes, such as KH.C13.98 and KH.C12.212, confirming their  
143 expression by in situ and single-cell qPCR (Figure 3a). We also looked at further B5.2-  
144 specific genes outside of the top 40 and found and validated additional genes, such as  
145 KH.C8.450 and KH.L60.2, thus demonstrating the value of single-cell RNA-seq for finding  
146 developmentally important genes.

147 Knowing the full range of patterns is important for understanding the progressive  
148 specification of cell fate in the early embryo. From our study, we found three potentially  
149 new patterns, highlighted in red in Figure 4a, one of which was validated by in situ and  
150 single-cell qPCR, namely KH.L152.12 (Figure 3e). We also validated further  
151 uncharacterized genes, namely KH.S1497.1, which expresses specifically in the animal  
152 hemisphere, and KH.C11.529 on the anterior side (Figure 3c-d).

153 In addition, we looked more widely in the top 60 results (Supplementary Figure 1),  
154 validating new genes, KH.C9.289 and KH.C4.260, by single-cell qPCR and in situ

155 hybridization (Figure 3b). These are expressed in all cells—except B5.2, a pattern  
156 known previously from Hes-a<sup>39</sup>. These results open up avenues for further research into  
157 developmental patterning in *Ciona*.

158

### 159 **Comparison with known in situ expression patterns**

160 Looking at it in the other direction and comparing our results to 76 genes with  
161 known in situ patterns<sup>23,35,38,40</sup> (Supplementary Table 1), we find that clustering agrees  
162 with the known in situ pattern for 38 of the 76 genes (Supplementary Figure 3a).  
163 Further, when the results are ranked according to how well the ON or OFF expression  
164 clusters separate (see Methods), all the top 34 results match known in situ patterns,  
165 with the exception of KH.L152.12. However, as described above, we tested this gene by  
166 in situ hybridization and single-cell qPCR, validating our RNA-seq measurement (Figure  
167 3e), which is in agreement with results from gene expression microarrays<sup>23</sup>.

168 In the lower ranked results (Supplementary Figure 3b) it could be argued that the  
169 algorithm fails in a few cases because it does not cluster correctly, such as for KH.C3.411  
170 (lefty/antivin) where the assumption of only two levels of expression does not seem to  
171 apply. For a few other genes, e.g. KH.C12.589 (DPOZ) and KH.C7.243 (Dll-B), the  
172 clustering is correct, but the effect size is small. For a few other genes, no reads were  
173 mapped, e.g. KH.C7.407 (SoxF), KH.C9.576 (Fringe 2) and KH.C13.22. However, in most  
174 cases where our single-cell RNA-seq does not agree with published in situ patterns, our  
175 expression measurements are low or relatively uniform across the eight cells—hence  
176 the algorithm functions correctly in attributing lower score to these results.

177 Thus, the method, in combination with single-cell RNA-seq, is effective in  
178 recovering many known patterns. In most cases, the discrepancy between the method



179 results and known in situ patterns occurs because the differences between cells as  
180 measured by single-cell RNA-seq is not as dramatic as the equivalent measurements  
181 from in situ hybridization. This suggests that in situ hybridization could be more  
182 sensitive at detecting differences in expression between cell types because the protocol  
183 can be optimized for each gene separately—although in some cases these might be false  
184 positives.

185

### 186 **Comparison with a standard differential expression method**

187 Dispersion or variance estimation is an important aspect of parametric methods of  
188 differential expression analysis<sup>30,31</sup>. Many studies include only a few replicates, and  
189 hence it is not clear if the observed variance for any specific gene is from an underlying  
190 difference in gene regulation, a result of limitations in measurement precision, an  
191 aberrant outlier, or biological variation (e.g. across embryos). Information from all genes  
192 is therefore used to estimate the within-group variance, where this is often assumed to  
193 be related to mean expression level. Using this estimate, it is possible to identify genes  
194 that vary more than expected or where the level of expression is significantly different  
195 than expected under the null hypothesis of no change in mean expression between  
196 groups.

197 However, in the case of a developing embryo, there are many different groupings of  
198 cells (the samples) that are relevant depending on the specific genes being considered—  
199 and for pattern discovery these are not known in advance. This means that dispersion  
200 can't be estimated assuming the same groups for all genes and nor are the dispersion  
201 estimation algorithms designed to operate with small numbers of genes, as is the case,  
202 for example, if a subset of genes is chosen in advance based on the clustering pattern.

203 Suitable extensions or strategies could deal with this, but at present it is reasonable to  
204 assume that parametric methods based on dispersion estimation might not work across  
205 different pattern subsets from the same dataset; that is, p-values will not be  
206 meaningfully comparable across patterns, thus limiting their applicability to pattern  
207 discovery. By contrast, our method takes a more direct approach that does not require  
208 parametric estimation nor assumptions regarding the source of variation. A further  
209 advantage is that the results are not affected by the proportions of the different patterns,  
210 including when only a few genes belong to a pattern of interest. This latter point is  
211 particularly important for early development where a few genes can have a critical  
212 impact on cell fate determination. However, our method does not produce p-values nor  
213 adjust its score based on the proportion of ON and OFF cells being compared. Thus, it is  
214 instructive to see how it performs in practice by comparing our top results with the top  
215 results of an approach using a standard differential expression method like DESeq2.

216 Therefore, we performed an exhaustive differential expression analysis applying  
217 DESeq2 to all 127 possible comparisons for eight cells (Figure 4) by estimating  
218 dispersion and fitting the DESeq2 negative binomial model for each comparison, with  
219 embryo and the cell pattern (ON or OFF) as factors. Unlike our method, which can scale  
220 to many more cell types, an exhaustive approach will not be possible in general because  
221 of combinatorial explosion—32 cells would require more than two billion DESeq2  
222 comparisons. Nevertheless, it provides a useful baseline for how DESeq2 performs by  
223 default— without having a smaller set of patterns as a guide. After applying DESeq2 to  
224 all comparisons, we combined the results by selecting, for each gene, the pattern with  
225 the lowest adjusted p-value (not adjusting further for the comparison across all  
226 patterns) and summarized the resulting patterns of the top 40 genes in Figure 4b, row i.

227 By comparing this with the result from our method (Figure 2 and Figure 4a), it is clear  
228 this approach finds more spurious patterns and fewer known patterns (i.e. seven known  
229 patterns compared to nine from our method).

230 As described above, the first step of our method is to find clusters for each gene.  
231 However, using these clusters as predefined comparisons does not significantly reduce  
232 the number to be tested by a standard differential expression method. In our data, there  
233 are 242 clusters out of a maximum possible 254 when considering both directions  
234 (increase and decrease in expression). However, the reduced list from our method (e.g.  
235 the 12 patterns in Figure 2 and Figure 4a) can be used to guide further analysis using  
236 established methods of differential expression analysis: by limiting the initial DESeq2  
237 comparisons to only these patterns, the number of spurious patterns are reduced. In  
238 Figure 4b, row ii, each gene is assigned the pattern with the lowest p-value from all  
239 comparisons. If the adjusted p-value is instead chosen from the pattern (or comparison)  
240 given by our method, the number of unknown patterns is further reduced and an extra  
241 known pattern is found (Figure 4b, row iii), thus demonstrating the value of using the  
242 patterns from our method as a guide.

243 In summary, there are more known patterns in the top results of our method than  
244 from an exhaustive application of DESeq2 (nine patterns compared to seven), showing  
245 that our method performs well in terms of sensitivity. Also, considering the well-known  
246 class of B5.2-specific genes, we find more in our top 40 results than DESeq2: 17  
247 compared to 7 in DESeq2's top 40 results. In both cases, these results largely comprise  
248 known B5.2-specific genes, with others validated as above (Figure 2 and Figure 3a).  
249 Nevertheless, there could be value in using additional methods, particularly when  
250 guided by given patterns, for example DESeq2 identifies further known B5.2 genes using

251 an adjusted p-value cutoff of 0.01, specifically pem2,Dll-B and midnolin. However, other  
252 patterns apparently produce more false positives when using the same threshold  
253 (Figure 4c), indicating that further work is required to adapt parametric methods to this  
254 type of data. In the meantime, our method offers a scalable and comprehensive  
255 approach for finding developmentally important expression patterns in single-cell RNA-  
256 seq data.

257

## 258 **Conclusion**

259 In conclusion, we have demonstrated that single-cell RNA-seq is a suitable  
260 replacement for extensive in situ screens during early embryo development. We  
261 recovered many known patterns, as well as new patterns and genes that had not been  
262 detected previously despite extensive efforts. This significantly broadens the  
263 possibilities for finding the key developmental regulators of less well studied organisms.

264

## 265 **Author contributions**

266 NML and NS conceived and supervised the project. All authors contributed to the  
267 study design. RS and TN optimized the experimental protocols, collected and prepared  
268 the samples and sequencing libraries. RS designed and performed the in situ and qPCR  
269 analysis. GRI conceived and implemented the pattern discovery method and performed  
270 the bioinformatics analysis. GRI, RS and NML wrote the paper and all authors edited and  
271 approved the final manuscript.

272

273 **Code and data access**

274 RNA-seq data have been deposited in the ArrayExpress database at EMBL-EBI  
275 ([www.ebi.ac.uk/arrayexpress](http://www.ebi.ac.uk/arrayexpress)) under accession number E-MTAB-6117. Software is  
276 available at <https://github.com/ilsley/Ciona16>.

277

278 **Acknowledgements**

279 We thank the staff of the Maizuru Fisheries Research Station of Kyoto University  
280 and Misaki Marine Biological Station of the university of Tokyo for collecting and  
281 cultivating *Ciona* under the National BioResource Project (NBRP) of MEXT, Japan, and  
282 RIKEN BRC for providing *Ciona* EST clones through the NBRP. We thank Vladimir Benes  
283 and Dinko Pavlinic in the Genomics Core Facility at the European Molecular Biology  
284 Laboratory (EMBL) for initial advice on the library preparation protocol and the  
285 members of the Sequencing Core facility of OIST for their support in running our  
286 samples on their Illumina MiSeq and HiSeq machines. We also thank Sylvain Guillot for  
287 his technical support and Filipe Tavares-Cadete for early feedback on the method. This  
288 work was supported by core funding from OIST to the Genomics & Regulatory Systems  
289 and Marine Genomics Units.

290 **References:**

291

- 292 1. Brennecke, P. *et al.* Accounting for technical noise in single-cell RNA-seq  
293 experiments. *Nat. Methods* **10**, 1093–1095 (2013).
- 294 2. Buettner, F. *et al.* Computational analysis of cell-to-cell heterogeneity in single-cell  
295 RNA-sequencing data reveals hidden subpopulations of cells. *Nat. Biotechnol.* **33**,  
296 155–160 (2015).
- 297 3. Deng, Q., Ramsköld, D., Reinius, B. & Sandberg, R. Single-Cell RNA-Seq Reveals  
298 Dynamic, Random Monoallelic Gene Expression in Mammalian Cells. *Science* **343**,  
299 193–196 (2014).
- 300 4. Grün, D., Kester, L. & van Oudenaarden, A. Validation of noise models for single-cell  
301 transcriptomics. *Nat. Methods* **11**, 637–640 (2014).
- 302 5. Pollen, A. A. *et al.* Low-coverage single-cell mRNA sequencing reveals cellular  
303 heterogeneity and activated signaling pathways in developing cerebral cortex. *Nat.*  
304 *Biotechnol.* **32**, 1053–1058 (2014).
- 305 6. Shalek, A. K. *et al.* Single-cell transcriptomics reveals bimodality in expression and  
306 splicing in immune cells. *Nature* **498**, 236–240 (2013).
- 307 7. Shalek, A. K. *et al.* Single-cell RNA-seq reveals dynamic paracrine control of cellular  
308 variation. *Nature* **510**, 363–369 (2014).
- 309 8. Björklund, Å. K. *et al.* The heterogeneity of human CD127+ innate lymphoid cells  
310 revealed by single-cell RNA sequencing. *Nat. Immunol.* **17**, 451–460 (2016).
- 311 9. Grün, D. *et al.* Single-cell messenger RNA sequencing reveals rare intestinal cell  
312 types. *Nature* **525**, 251–255 (2015).

- 313 10. Jaitin, D. A. *et al.* Massively Parallel Single-Cell RNA-Seq for Marker-Free  
314 Decomposition of Tissues into Cell Types. *Science* **343**, 776–779 (2014).
- 315 11. Kiselev, V. Y. *et al.* SC3: consensus clustering of single-cell RNA-seq data. *Nat. Methods*  
316 **14**, 483–486 (2017).
- 317 12. Mojtahedi, M. *et al.* Cell Fate Decision as High-Dimensional Critical State Transition.  
318 *PLOS Biol.* **14**, e2000640 (2016).
- 319 13. Olsson, A. *et al.* Single-cell analysis of mixed-lineage states leading to a binary cell  
320 fate choice. *Nature* **537**, 698–702 (2016).
- 321 14. Richard, A. *et al.* Single-Cell-Based Analysis Highlights a Surge in Cell-to-Cell  
322 Molecular Variability Preceding Irreversible Commitment in a Differentiation  
323 Process. *PLOS Biol.* **14**, e1002585 (2016).
- 324 15. Trapnell, C. *et al.* The dynamics and regulators of cell fate decisions are revealed by  
325 pseudotemporal ordering of single cells. *Nat. Biotechnol.* **32**, 381–386 (2014).
- 326 16. Biase, F. H., Cao, X. & Zhong, S. Cell fate inclination within 2-cell and 4-cell mouse  
327 embryos revealed by single-cell RNA sequencing. *Genome Res.* **24**, 1787–1796  
328 (2014).
- 329 17. Goolam, M. *et al.* Heterogeneity in Oct4 and Sox2 Targets Biases Cell Fate in 4-Cell  
330 Mouse Embryos. *Cell* **165**, 61–74 (2016).
- 331 18. Hashimshony, T., Wagner, F., Sher, N. & Yanai, I. CEL-Seq: single-cell RNA-Seq by  
332 multiplexed linear amplification. *Cell Rep.* **2**, 666–673 (2012).
- 333 19. Scialdone, A. *et al.* Resolving early mesoderm diversification through single-cell  
334 expression profiling. *Nature* **535**, 289–293 (2016).

- 335 20. Tintori, S. C., Osborne Nishimura, E., Golden, P., Lieb, J. D. & Goldstein, B. A  
336 Transcriptional Lineage of the Early *C. elegans* Embryo. *Dev. Cell* **38**, 430–444  
337 (2016).
- 338 21. Xue, Z. *et al.* Genetic programs in human and mouse early embryos revealed by  
339 single-cell RNA sequencing. *Nature* **500**, 593–597 (2013).
- 340 22. Yan, L. *et al.* Single-cell RNA-Seq profiling of human preimplantation embryos and  
341 embryonic stem cells. *Nat. Struct. Mol. Biol.* **20**, 1131–1139 (2013).
- 342 23. Matsuoka, T., Ikeda, T., Fujimaki, K. & Satou, Y. Transcriptome dynamics in early  
343 embryos of the ascidian, *Ciona intestinalis*. *Dev. Biol.* **384**, 375–385 (2013).
- 344 24. Conklin, E. G. The organization and cell-lineage of the ascidian egg. *J. Acad. Nat. Sci.*  
345 *Phila.* **13**, 1–119 (1905).
- 346 25. Lemaire, P. Unfolding a chordate developmental program, one cell at a time:  
347 Invariant cell lineages, short-range inductions and evolutionary plasticity in  
348 ascidians. *Dev. Biol.* **332**, 48–60 (2009).
- 349 26. Nishida, H. Specification of embryonic axis and mosaic development in ascidians.  
350 *Dev. Dyn.* **233**, 1177–1193 (2005).
- 351 27. Rothbacher, U., Bertrand, V., Lamy, C. & Lemaire, P. A combinatorial code of maternal  
352 GATA, Ets and  $\beta$ -catenin-TCF transcription factors specifies and patterns the early  
353 ascidian ectoderm. *Development* **134**, 4023–4032 (2007).
- 354 28. Satou, Y. & Imai, K. S. Gene regulatory systems that control gene expression in the  
355 *Ciona* embryo. *Proc. Jpn. Acad. Ser. B* **91**, 33–51 (2015).
- 356 29. Cohen, J. Statistical Power Analysis for the Behavioral Sciences. (Routledge, 1988).
- 357 30. Love, M. I., Huber, W. & Anders, S. Moderated estimation of fold change and  
358 dispersion for RNA-seq data with DESeq2. *Genome Biol.* **15**, 550 (2014).



- 359 31. McCarthy, D. J., Chen, Y. & Smyth, G. K. Differential expression analysis of multifactor  
360 RNA-Seq experiments with respect to biological variation. *Nucleic Acids Res.* **40**,  
361 4288–4297 (2012).
- 362 32. Bertrand, V., Hudson, C., Caillol, D., Popovici, C. & Lemaire, P. Neural Tissue in  
363 Ascidian Embryos Is Induced by FGF9/16/20, Acting via a Combination of Maternal  
364 GATA and Ets Transcription Factors. *Cell* **115**, 615–627 (2003).
- 365 33. Hamaguchi, M., Fujie, M., Noda, T. & Satoh, N. Microarray analysis of zygotic  
366 expression of transcription factor genes and cell signaling molecule genes in early  
367 *Ciona intestinalis* embryos. *Dev. Growth Differ.* **49**, 27–37 (2007).
- 368 34. Hudson, C. & Yasuo, H. Patterning across the ascidian neural plate by lateral Nodal  
369 signalling sources. *Development* **132**, 1199–1210 (2005).
- 370 35. Imai, K. S., Hino, K., Yagi, K., Satoh, N. & Satou, Y. Gene expression profiles of  
371 transcription factors and signaling molecules in the ascidian embryo: towards a  
372 comprehensive understanding of gene networks. *Development* **131**, 4047–4058  
373 (2004).
- 374 36. Imai, K. S., Levine, M., Satoh, N. & Satou, Y. Regulatory Blueprint for a Chordate  
375 Embryo. *Science* **312**, 1183–1187 (2006).
- 376 37. Shi, W. & Levine, M. Ephrin signaling establishes asymmetric cell fates in an  
377 endomesoderm lineage of the *Ciona* embryo. *Development* **135**, 931–940 (2008).
- 378 38. Prodon, F., Yamada, L., Shirae-Kurabayashi, M., Nakamura, Y. & Sasakura, Y.  
379 Postplasmic/PEM RNAs: A class of localized maternal mRNAs with multiple roles in  
380 cell polarity and development in ascidian embryos. *Dev. Dyn.* **236**, 1698–1715  
381 (2007).

- 382 39. Satou, Y., Kawashima, T., Shoguchi, E., Nakayama, A. & Satoh, N. An Integrated  
383 Database of the Ascidian, *Ciona intestinalis*: Towards Functional Genomics. *Zoolog.*  
384 *Sci.* **22**, 837–843 (2005).
- 385 40. Miwata, K. *et al.* Systematic analysis of embryonic expression profiles of zinc finger  
386 genes in *Ciona intestinalis*. *Dev. Biol.* **292**, 546–554 (2006).
- 387 41. Hoshino, Z. & Tokioka, T. An unusually robust *Ciona* from the northeastern coast of  
388 Honsyu Island, Japan. *Publ Seto Mar Biol Lab* **15**, 275–290 (1967).
- 389 42. Pennati, R. *et al.* Morphological Differences between Larvae of the *Ciona intestinalis*  
390 Species Complex: Hints for a Valid Taxonomic Definition of Distinct Species. *PLOS*  
391 *ONE* **10**, e0122879 (2015).
- 392 43. Tang, F. *et al.* RNA-Seq analysis to capture the transcriptome landscape of a single  
393 cell. *Nat. Protoc.* **5**, 516–535 (2010).
- 394 44. Tang, F. *et al.* mRNA-Seq whole-transcriptome analysis of a single cell. *Nat. Methods*  
395 **6**, 377–382 (2009).
- 396 45. Langmead, B. & Salzberg, S. L. Fast gapped-read alignment with Bowtie 2. *Nat.*  
397 *Methods* **9**, 357–359 (2012).
- 398 46. Dehal, P. *et al.* The Draft Genome of *Ciona intestinalis*: Insights into Chordate and  
399 Vertebrate Origins. *Science* **298**, 2157–2167 (2002).
- 400 47. Satou, Y. *et al.* Improved genome assembly and evidence-based global gene model  
401 set for the chordate *Ciona intestinalis*: new insight into intron and operon  
402 populations. *Genome Biol.* **9**, R152 (2008).
- 403 48. Kim, D. *et al.* TopHat2: accurate alignment of transcriptomes in the presence of  
404 insertions, deletions and gene fusions. *Genome Biol.* **14**, R36 (2013).

- 405 49. Anders, S., Pyl, P. T. & Huber, W. HTSeq—a Python framework to work with high-  
406 throughput sequencing data. *Bioinformatics* **31**, 166–169 (2015).
- 407 50. External RNA Controls Consortium. Proposed methods for testing and selecting the  
408 ERCC external RNA controls. *BMC Genomics* **6**, 150 (2005).
- 409 51. Jiang, L. *et al.* Synthetic spike-in standards for RNA-seq experiments. *Genome Res.* **21**,  
410 1543–1551 (2011).
- 411 52. Wada, S., Katsuyama, Y., Yasugi, S. & Saiga, H. Spatially and temporally regulated  
412 expression of the LIM class homeobox gene *Hrlim* suggests multiple distinct  
413 functions in development of the ascidian, *Halocynthia roretzi*. *Mech. Dev.* **51**, 115–  
414 126 (1995).
- 415 53. Satou, Y. *et al.* A cDNA resource from the basal chordate *Ciona intestinalis*. *genesis*  
416 **33**, 153–154 (2002).
- 417 54. Ritchie, M. E. *et al.* limma powers differential expression analyses for RNA-  
418 sequencing and microarray studies. *Nucleic Acids Res.* **43**, e47–e47 (2015).
- 419

420 **Online methods:**

421 **Study design**

422 We isolated cells from five 16-cell stage *Ciona* embryos, each on a different day  
423 (Supplementary Table 2). Early ascidian embryos are thought to be bilaterally  
424 symmetrical so we collected eight cells from the right side of each embryo. The cells  
425 were collected individually in batches of eight cells from the same embryo on the same  
426 day, with sequencing libraries prepared in parallel, barcoded and then sequenced  
427 together. This means that biological variation between embryos and technical variation  
428 between batches cannot be distinguished. The advantage of this design is that it  
429 minimizes technical variation between cell types of the same embryo and controls for  
430 confounding technical and biological variation between embryos. Averaging across the  
431 cell types of different batches reduces this unwanted variation, maintaining cell-specific  
432 variation. Our results show that cells from the same embryo are more similar to each  
433 other than the same cell types are across individuals, with a similar number of genes  
434 detected per cell type (Figure 1a-d).

435

436 **Preparation of *Ciona* embryos**

437 *Ciona intestinalis* type A, recently designated *Ciona robusta*<sup>41,42</sup>, adults were  
438 obtained from Maizuru Fisheries Research Station (Kyoto University) and Misaki Marine  
439 Biological station (The University of Tokyo) under the National Bio-Resource Project for  
440 *Ciona*. They were maintained in aquarium in our laboratory at Okinawa Institute of  
441 Science and Technology Graduate University under constant light (Calcitrans, Nisshin  
442 Marineteck Co., Ltd.) for three days apart from a few hours of darkness a day with  
443 feeding to induce spawning of the old eggs. After this, the *Ciona* were maintained under

444 constant light to induce oocyte maturation. Eggs and sperm were obtained surgically  
445 from the gonoducts. Embryos were dechorionated after insemination using a solution of  
446 0.07% actinase and 1.3% sodium thioglycolate. Eggs were reared to reach the 16-cell  
447 stage in Millipore-filtered seawater (MFSW) at about 18 °C. Embryos from each  
448 insemination batch were kept to check the ratio that developed into morphologically  
449 normal tailbud. We only used embryos from batches where more than 70% developed  
450 normally to tailbud (10 hours post fertilization at 18 degrees) (see Supplementary Table  
451 2 for embryo batch information).

452

### 453 **Naming of cells**

454 In *Ciona*, cells are named using the nomenclature of Conklin<sup>24</sup>: the animal side is  
455 prefixed with a lowercase letter (a or b) and the vegetal with an uppercase letter; the  
456 anterior with A or a and the posterior with B or b. The initial letter is followed by a  
457 number that indicates the embryo stage since fertilization, with individual cells  
458 numbered according to their lineage. At the 16-cell stage, the animal domain  
459 corresponds to a5.3, a5.4, b5.3 and b5.4, the vegetal domain to A5.1, A5.2, B5.1 and B5.2,  
460 and postplasmic RNAs are localized to B5.2.

461

### 462 **Isolation of single cells at the 16-cell stage**

463 At a defined point in development of the 16-cell embryo i.e., at the stage  
464 immediately after compaction of the embryo (2.5 ~ 2.6 hours post fertilization), the  
465 embryo was transferred to 4°C to slow its development. Each blastomere was isolated  
466 with a fine glass needle in a mannitol solution (0.77 M mannitol : MFSW, 9:1) under a  
467 stereo microscope at 4 °C regulated by a thermo plate (Tokai Hit Co., Ltd.) and its

468 identity noted. Isolated blastomeres were picked up and transferred immediately with a  
469 mouth pipet into a lysis buffer<sup>43</sup> for reverse transcription.

470

#### 471 **Library preparation**

472 We followed the single-cell library preparation method of Tang et al<sup>43,44</sup> with some  
473 modification. We added ERCC spike-in RNA (Thermo Fisher scientific, 4456740,  
474 1:80000) to each lysis buffer and applied 14 and then 9 cycles of PCR amplification after  
475 second strand synthesis. Amplified cDNA was purified with MinElute PCR Purification  
476 kit (28006, QIAGEN) and QIAquick PCR Purification Kit (28106, QIAGEN) after each PCR  
477 reaction respectively and its concentration measured with Qubit® 2.0 Fluorometer  
478 (Q32866, Life Technologies) to have more than 150 ng total yield of cDNA. The quality of  
479 the amplified cDNA and distribution of DNA fragment size were confirmed by Agilent  
480 2100 Bioanalyzer (Agilent Technologies) with High Sensitivity DNA Kit (5067-4626,  
481 Agilent) to consist mainly of 1.0-1.5 kb fragments.

482 Amplified cDNAs were sheared using sonication Covaris S2 System to produce  
483 DNA of 300 bp on average. The settings were as follows: Duty cycle: 20%, Intensity: 5,  
484 Cycles per burst: 200, Power mode - Frequency sweeping, Treatment time: 90 seconds,  
485 Temperature: 12°C.

486 NEB Next® ChIP-Seq Library Prep Master Mix Set for Illumina® (E6240, NEB) was  
487 applied to sheared cDNA for preparation of the library for the Illumina platform.

488 NEBNext® Multiplex Oligos for Illumina (E7335, E7500, NEB Next Multiplex Oligos for  
489 Illumina, NEB) were combined to introduce an index and adaptor to the double-  
490 stranded DNA. After extraction of the 300 bp fraction of adaptor-ligated DNA by E-Gel

491 Size Select 2% Agarose (G661002, Invitrogen), DNA was amplified with individual index  
492 primers using PCR with 19 cycles.

493 The amplified DNA fragment composition was purified with Agencourt AMPure XP  
494 twice (A63881, Beckman) and again checked by Qubit (> 60 ng of cDNA in total yield)  
495 and by Bioanalyzer to ensure that the fragment size was sharply distributed around 300  
496 bp (on average, about 320 bp with a standard deviation of 40). The concentration of  
497 fragments with appropriate index adapters was quantified by KAPA Library  
498 Quantification Kits (KAPA Library Quantification Kits, Illumina GA/Universal, KK4825,  
499 Genetics) to ensure that the final libraries had adapters for both ends and their  
500 concentration was at least 20 pM.

501

## 502 **Data generation and quality checking**

503 Libraries were sequenced on Illumina's (San Diego, CA) MiSeq benchtop sequencer  
504 and Illumina HiSeq 2500. Libraries were prepared with different index primers and  
505 sequenced on MiSeq using paired 150 nt reads (No. MS-102-2002, MiSeq Reagent Kit  
506 v2) with eight multiplexed samples per run with the standard Illumina protocols. The  
507 same libraries were sequenced on an Illumina HiSeq 2500 with 150 bp paired end reads  
508 (No. PE-402-4001 and FC-402-4001, TruSeq Rapid Cluster - Paired-End and SBS Kits)  
509 with 16 multiplexed samples per lane following standard Illumina protocols. Our results  
510 from using HiSeq and MiSeq were similar (Figure 1c-d, cf. Supplementary Figures 1 and  
511 2).

512 The resulting reads were aligned using Bowtie<sup>45</sup> version 2.2.6 to the *Ciona* KH  
513 genome assembly<sup>46,47</sup>, downloaded from Ghost  
514 ([http://ghost.zool.kyoto-u.ac.jp/download\\_kh.html](http://ghost.zool.kyoto-u.ac.jp/download_kh.html)). Reads were mapped using local

515 alignment (--local), with other settings at their default. We did not trim or filter reads,  
516 but instead made use of local alignment to find the optimal match. This had the  
517 additional benefit that we did not need to split up reads to handle transcripts spanning  
518 more than one intron, as is done, for example, in TopHat<sup>48</sup>. Gene counts were calculated  
519 from the resulting alignment files using htseq-count<sup>49</sup> with the non-stranded option and  
520 mode “intersection-nonempty” against the KH gene models (version 2013) downloaded  
521 from Ghost.

522 We assessed our samples for mapping quality. We excluded one embryo from  
523 subsequent analysis since it had oligo-dT primer sequence in more than 50% of its read  
524 pairs; the remaining four embryos had less than 1% of read pairs affected. All remaining  
525 samples mapped well to the genome (Supplementary Table 3) and a uniform number of  
526 genes were detected (about 60%), although embryo 1 had noticeably fewer detected  
527 genes for some of its cells.

528

### 529 **Assessment of expression data variability and reproducibility**

530 Our results show limited technical variation within each batch: the expression  
531 levels in different cell types from the same embryo are well correlated (mostly above 0.8  
532 for embryos 2, 3 and 4). They are, in fact, more similar to each other than the same cell  
533 types are across different individuals (Figure 1a-b). Although we cannot separate out  
534 the sources of cross-embryo variation, this result is consistent with a previous report  
535 showing that maternal mRNA levels vary significantly between unfertilized eggs from  
536 different individuals<sup>23</sup>. It is also worth noting that very little of the variation between  
537 embryos is from the sequencing run. This can be seen by comparing our sequence  
538 results from MiSeq with HiSeq—the correlation between unnormalized counts from the



539 two platforms is over 99% for every cell type, whether zero counts are included or  
540 excluded. This is consistent with previous results showing high correlation between  
541 expression measurements from tens of millions of reads per cell and those from lower  
542 coverage of a million or fewer reads<sup>5,7</sup>.

543 This embryo batch effect is further demonstrated by a Principal Components  
544 Analysis (Figure 1b), which shows a similar result with the cell types of embryos 2, 3  
545 and 4 being close to each on the first two components (which explain 56% of the  
546 variance) and the cell types of embryo 1 being more spread out

547 The close clustering of cells from the same embryo, as well as their high  
548 correlation, suggests that our experimental measurements are reliable and reproducible  
549 within each batch (or embryo). A confirmation of the reproducibility of our results is the  
550 tight distribution of genes detected across samples within embryos (Figure 1c-d). Genes  
551 were considered detected when the measured count was greater than zero. These  
552 results show that slightly more genes were detected on HiSeq than MiSeq, but that the  
553 median difference for each embryo is less than 10%. This is comparable with a previous  
554 result showing a reduction of genes detected of around 39% when lowering sequence  
555 coverage to less than a million reads per cell<sup>5</sup>. As before, embryo 1 showed more  
556 variability across samples than the other embryos.

557 We also made use of ERCC spike-in controls<sup>50,51</sup> to assess the quality of our library  
558 preparation, including the steps of reverse transcription and PCR amplification by  
559 comparing the measured counts with known spiked-in mRNA concentrations. We added  
560 the spike-in at a low concentration (1:80,000 dilution), and yet found good agreement  
561 between the known spike-in concentrations and expression measurements. To assess  
562 this, we regressed, with no intercept, the square root of the unnormalized counts against

563 the square root of the known spike-in concentrations. The resulting  $R^2$  value was greater  
564 than 85% for every cell in embryos 2, 3 and 4 (Figure 1e). The poorer fit for the spike-  
565 ins of embryo 1 also reveals that the somewhat anomalous expression measurements of  
566 embryo 1 likely result from the library preparation step, particularly since PCR  
567 amplification produced less RNA from most cells of this embryo compared to other  
568 embryos.

569 A further validation of our data is a comparison of our results with previously  
570 published data for the 16-cell stage that was generated using gene expression  
571 microarrays<sup>23</sup>. We found good agreement with the key genes analyzed in the associated  
572 paper (Supplementary Figure 4).

573

#### 574 **Pattern discovery**

575 Hierarchical clustering to determine candidate patterns was performed with  
576 ClusteringComponents in Mathematica 10.4 with the Agglomerate method and  
577 Euclidean distance function. This is equivalent to *hclust* in R with the single linkage  
578 method. The quantile method used linear interpolation equivalent to type 5 in the R  
579 *quantile* function (the hydrologist method).

580

#### 581 **Single-cell qPCR analysis**

582 cDNA was reverse transcribed from all cells of one embryo per gene replicate  
583 using the same protocol we used for single-cell RNA-seq<sup>43,44</sup>. Quantitative PCR was  
584 performed using a StepOnePlus PCR machine (Applied Biosystems) with the SYBR green  
585 method (No. RR820B, Takara). Each gene was measured with three replicates, except for  
586 KH.L152.12, which had four. The qPCR measures for the cell types of each embryo were

587 scaled between 0 and 1 and then averaged for each cell type across replicates. If there  
588 was insufficient target mRNA, it was first amplified using primers covering a wider  
589 region of the target gene than those used for single-cell qPCR. Amplification of a specific  
590 product in each reaction was confirmed by determining a dissociation curve. The  
591 primers for single-cell qPCR analysis are listed in Supplementary Table 4.

592

### 593 **In situ hybridization**

594 Whole-mount in situ hybridization was carried out as previously described with  
595 minor modification<sup>52</sup>. Dig-labeled antisense RNA probes were synthesized in vitro from  
596 cDNAs from the *Ciona* cDNA project<sup>53</sup>. The IDs for the cDNA clones are shown in  
597 Supplementary Table 5.

598

### 599 **Microarray processing**

600 Previously published microarray data<sup>23</sup> was processed with the limma R package<sup>54</sup>.  
601 Background was corrected using *normexp* and arrays were normalized with the *quantile*  
602 method.

603

### 604 **Gene models and names**

605 Gene names for the KH gene models were downloaded from Ghost  
606 ([http://ghost.zool.kyoto-u.ac.jp/TF\\_KH.html](http://ghost.zool.kyoto-u.ac.jp/TF_KH.html) and [http://ghost.zool.kyoto-](http://ghost.zool.kyoto-u.ac.jp/ST_KH.html)  
607 [u.ac.jp/ST\\_KH.html](http://ghost.zool.kyoto-u.ac.jp/ST_KH.html)) and supplemented with names from Prodon et al<sup>38</sup>.

608

609 **Differential expression analysis**

610           The DESeq2 package from R was used for differential expression analysis. A  
611 DESeqDataSet was created from the matrix of counts. The DESeq function was used with  
612 default values. The design formula included the embryo and the cells' grouping (ON or  
613 OFF) for the relevant pattern.

614 **Figure Legends:**

615

616 **Figure 1. (a and b)** Gene expression is more similar between cells of the same embryo  
617 or batch than between cell types across batches. **(a)** Clustered heatmap of the  
618 correlation matrix of transformed expression data ( $\varphi$ ) from HiSeq samples (excluding  
619 ERCC counts and genes with zero counts), with the histogram in the top left providing  
620 the color key. **(b)** PCA plot showing the first two components, which explain 56% of the  
621 total variance. **(c and d)** The number of genes detected is consistent across the four  
622 embryo replicates whether the libraries were sequenced on MiSeq or HiSeq. **(c)** Scatter  
623 plot showing the consistent relationship between MiSeq and HiSeq, with more zeros or  
624 undetected genes for some cells of embryo 1 compared to the others. **(d)** Boxplots  
625 showing the narrower distribution of genes detected for embryos 2 to 4 compared to  
626 embryo 1 and the consistent increase from MiSeq to HiSeq. **(e)** R-squared values  
627 resulting from linear regression of the square root of unnormalized counts from the  
628 HiSeq data against the square root of known concentrations as the independent  
629 variable, with no intercept term.

630

631 **Figure 2.** All previously known patterns occur in the top 40 genes when ranked  
632 according to their Transquantile Range (TQR). **(a)** Schematic of the eight cell types  
633 showing their arrangement in the expression summary plots in **(b)**. **(b)** Expression  
634 summary plots of the top 40 genes, grouped by pattern, with a red border indicating an  
635 unknown pattern. A summary of the patterns is shown in Figure 4a. Genes with  
636 previously uncharacterized, but now validated patterns are highlighted in red. For each  
637 gene, the columns indicate the gene name, any previously known in situ pattern in blue

638 (gray if not known), the average of the transformed expression values (clipped above  
639 0.05), the pattern resulting from clustering, and finally, the TQR as the reliability score,  
640 scaled for visualization.

641

642 **Figure 3.** Pattern discovery results are validated by in situ hybridization and single-cell  
643 qPCR. **(a-e)** For each pattern being tested, a schematic (left) indicates the expected  
644 pattern of expression using the layout of Figure 2a. The photomicrographs show the  
645 results of situ hybridizations (middle) viewed from the animal and vegetal side. The  
646 arrowheads pointing to the expressing cells are shown on only one side of the embryo.  
647 The scale bar indicates 100  $\mu\text{m}$ . Gene expression levels for each cell type was measured  
648 by single-cell qPCR. The qPCR measures for the cell types of each embryo were scaled  
649 between 0 and 1 and then averaged for each cell type across replicates. The means for  
650 each cell type are shown in the bar charts (right).

651

652 **Figure 4.** Standard differential expression analysis finds many false positives with fewer  
653 true positives in the top results than when ranking by Transquantile Range. **(a)** The  
654 patterns of the top 40 genes are shown with the number of associated genes below.  
655 Black indicates a known pattern, and red a novel or spurious pattern. The layout for  
656 each pattern is shown in the key on the right. **(b)** The top 40 genes and their  
657 corresponding patterns from different approaches. **(i)** Exhaustively running DESeq2  
658 against all 127 possible comparisons and selecting, for each gene, the pattern with the  
659 lowest adjusted p-value. The maximum adjusted p-value for this set is  $2.6 \times 10^{-8}$ . **(ii)**  
660 Running DESeq2 separately for each of the patterns from (a) and selecting, for each  
661 gene, the pattern with the lowest adjusted p-value. DESeq2 finds genes up- and down-

662 regulated and hence the pattern for B5.2 and its complement are part of the same run,  
663 leading to 11 runs in total. Similarly, for some genes, DESeq2 selects a pattern  
664 complementary to the given 12 patterns. **(iii)** DESeq2 against the 12 patterns shown in  
665 (a), but using the adjusted p-value for the given pattern. **(c)** DESeq2 results for a  
666 selection of patterns. Each DESeq2 analysis is run for all genes and the top results  
667 ranked by adjusted p-value with a cut-off of  $p < 0.01$ . For illustration, a line is drawn  
668 showing a stricter threshold, which is equivalent to the highest p-value of the top 40  
669 results found using the approach of row i in (b). The results for each pattern show  
670 previously known in situ results as well as averaged expression. For comparison, the  
671 genes are only counted once in row i of (b), i.e. for the pattern that gives the lowest  
672 p-value.

673 **Supplementary Material**

674

|                              |                                                  |                 |
|------------------------------|--------------------------------------------------|-----------------|
| <b>Supplementary Table 1</b> | List of known in situ patterns                   | SuppTable1.xlsx |
| <b>Supplementary Table 2</b> | Sample, library preparation and sequencing dates | SuppTable2.xlsx |
| <b>Supplementary Table 3</b> | Sequencing statistics                            | SuppTable3.xlsx |
| <b>Supplementary Table 4</b> | Primers used for qPCR                            | SuppTable4.xlsx |
| <b>Supplementary Table 5</b> | Single-cell qPCR measurements                    | SuppTable5.xlsx |
| <b>Supplementary Table 6</b> | IDs for the cDNA clones                          | SuppTable6.xlsx |

675

676 **Supplementary Figure 1.** The top 60 results from sequencing our libraries on Illumina  
677 HiSeq 2500, with the genes grouped by pattern. For each gene, the columns indicate the  
678 gene name, any previously known in situ pattern in blue (gray if not known), the  
679 average of the transformed expression values (clipped above 0.05), the pattern resulting  
680 from clustering, and finally, the TQR as the reliability score.

681

682 **Supplementary Figure 2.** The top 60 results from sequencing our libraries on Illumina  
683 MiSeq, with the genes grouped by pattern. For each gene, the columns are the same as in  
684 Supplementary Figure 1.

685

686 **Supplementary Figure 3.** Comparison with known in situ patterns. For each gene, the  
687 columns are the same as in Supplementary Figure 1. The results are divided into **(a)** the  
688 top 34 results and **(b)** the next 42 results from pattern discovery for genes with known  
689 in situ patterns.

690



691 **Supplementary Figure 4**

692 Comparison of heatmaps from cellular resolution microarray data <sup>23</sup> with  $\varphi$ -

693 transformed single-cell RNA-seq.

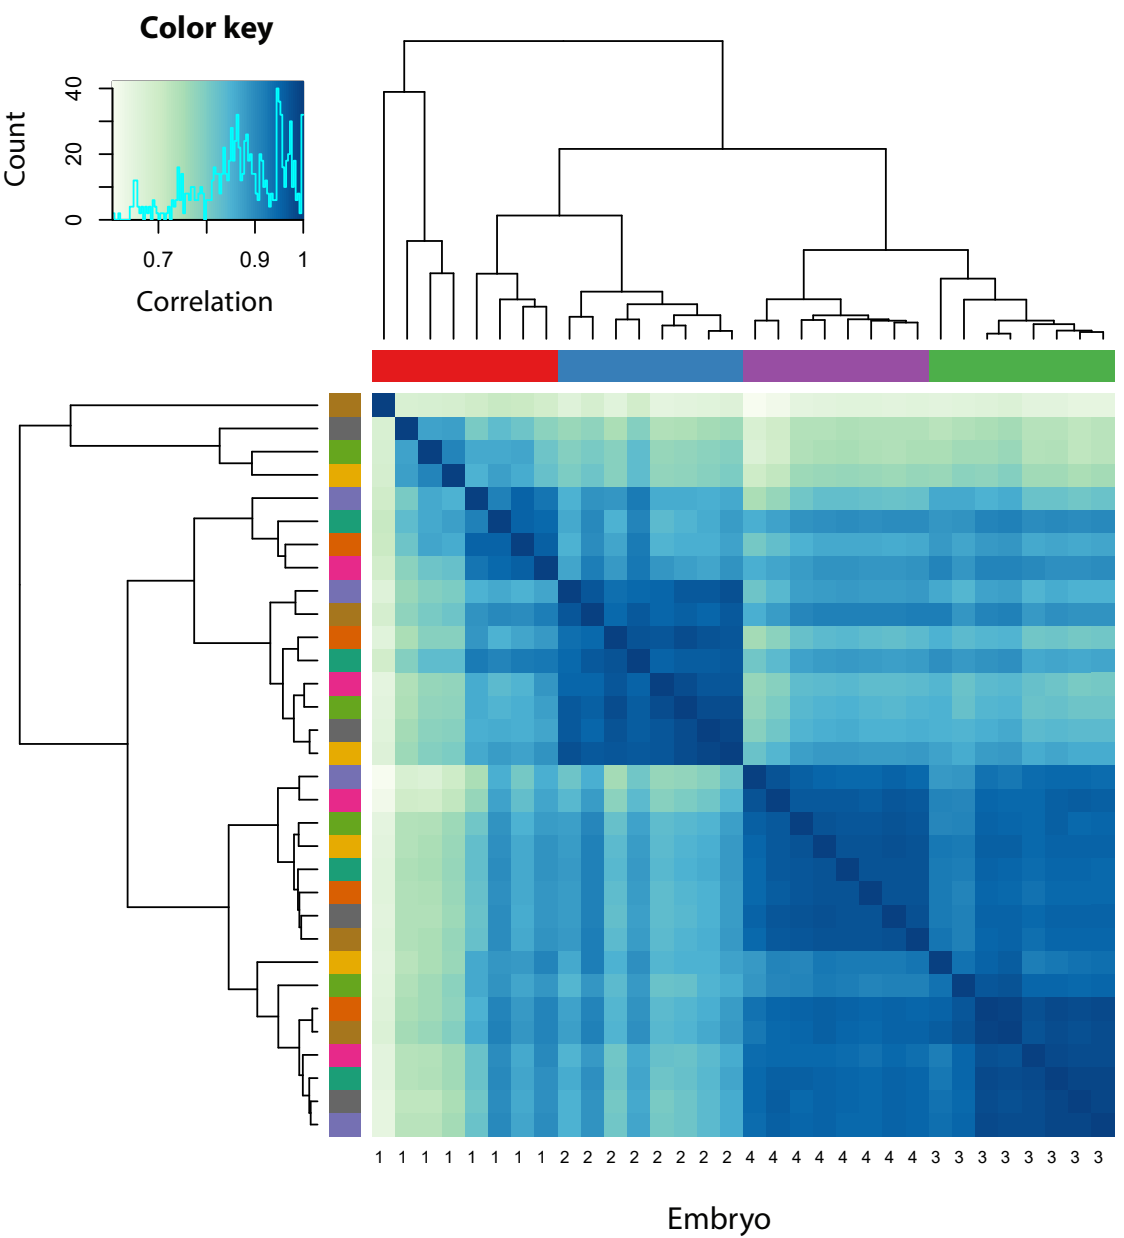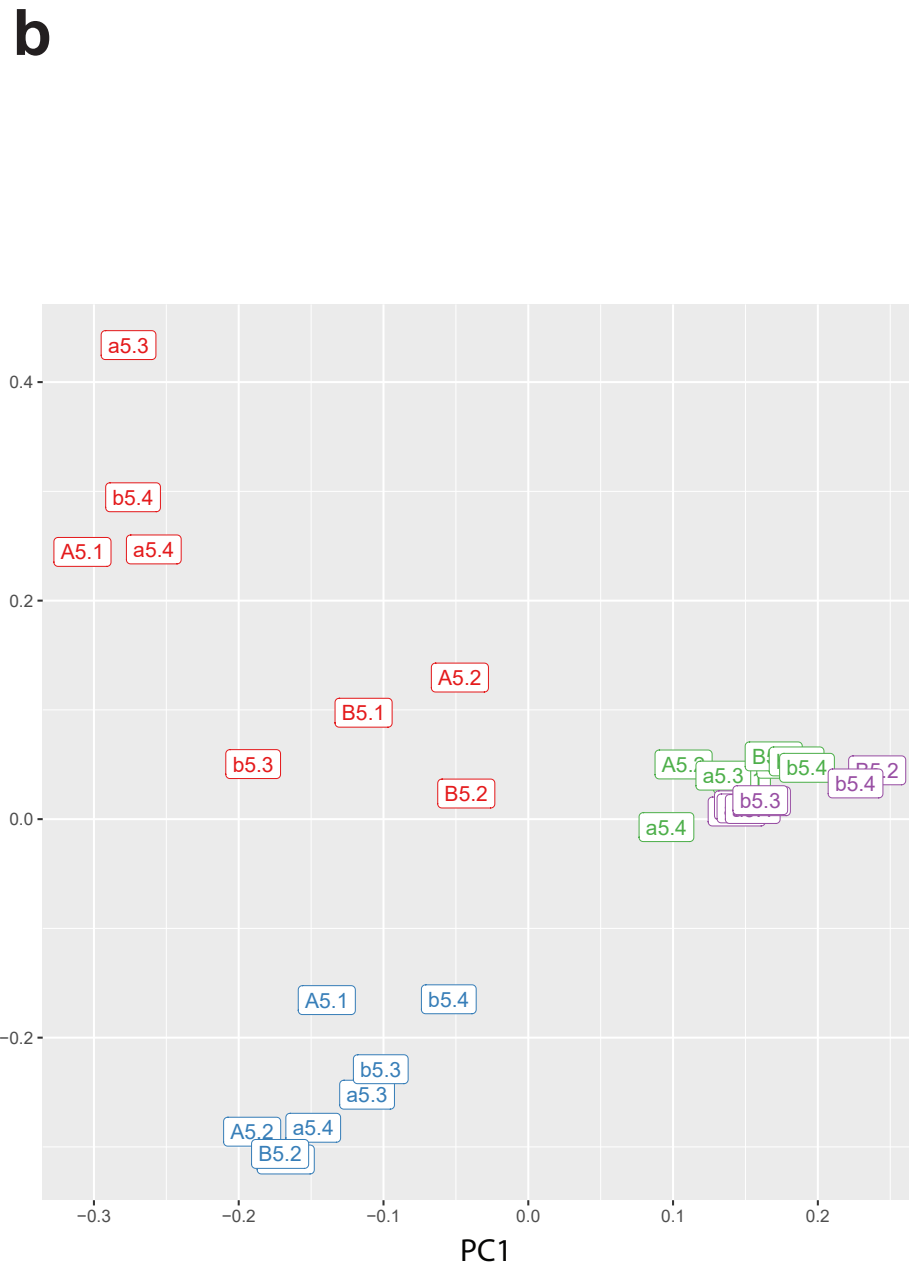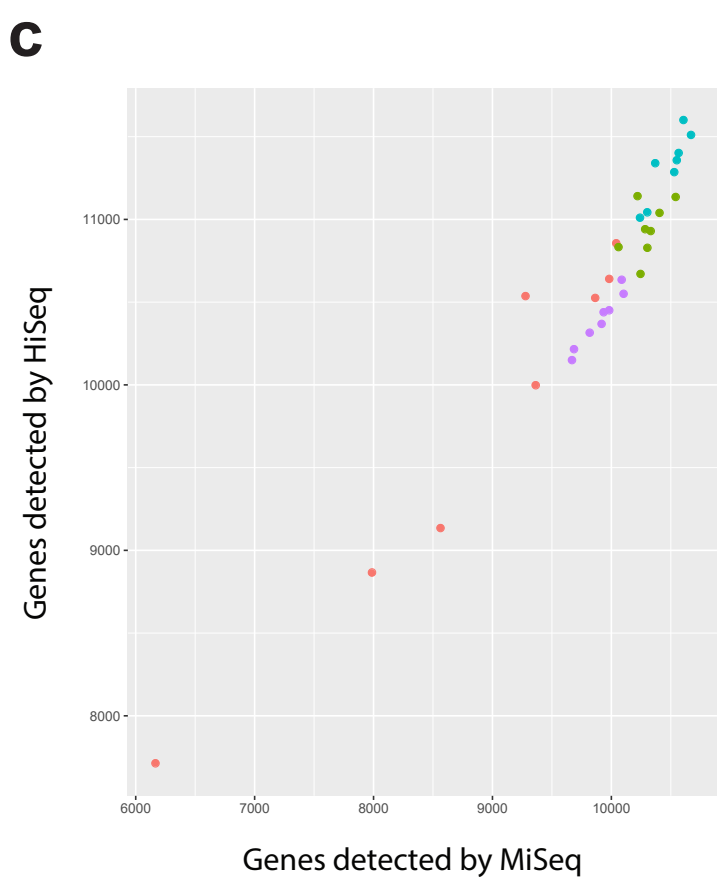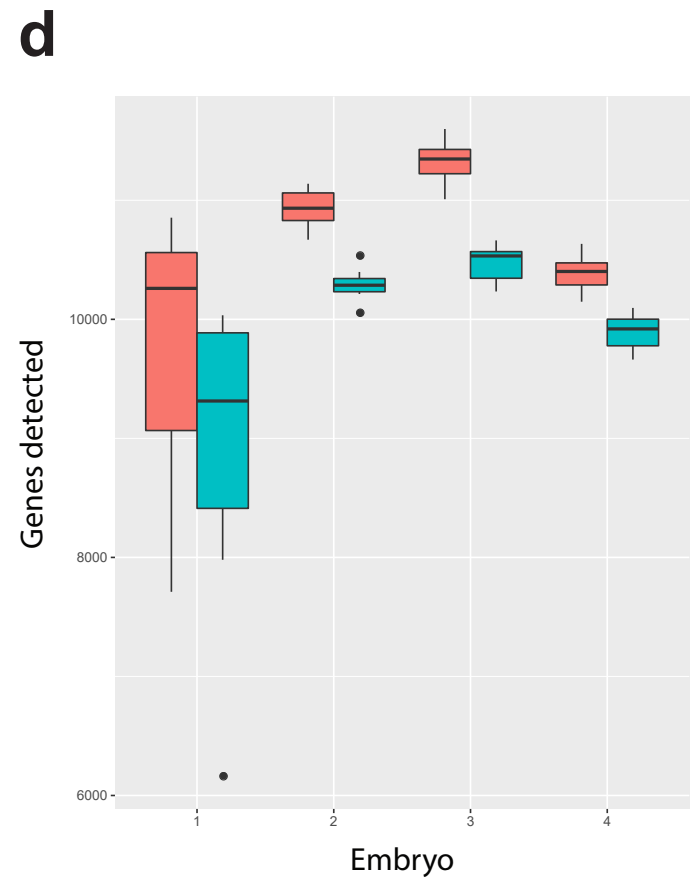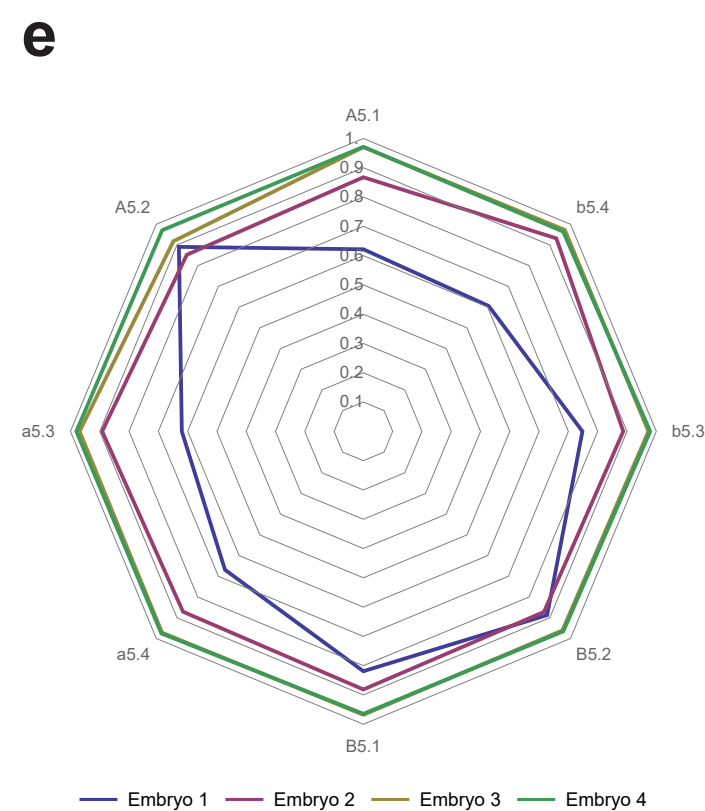

a

|      |      |      |      |
|------|------|------|------|
| a5.3 | a5.4 | b5.3 | b5.4 |
| A5.1 | A5.2 | B5.1 | B5.2 |

b

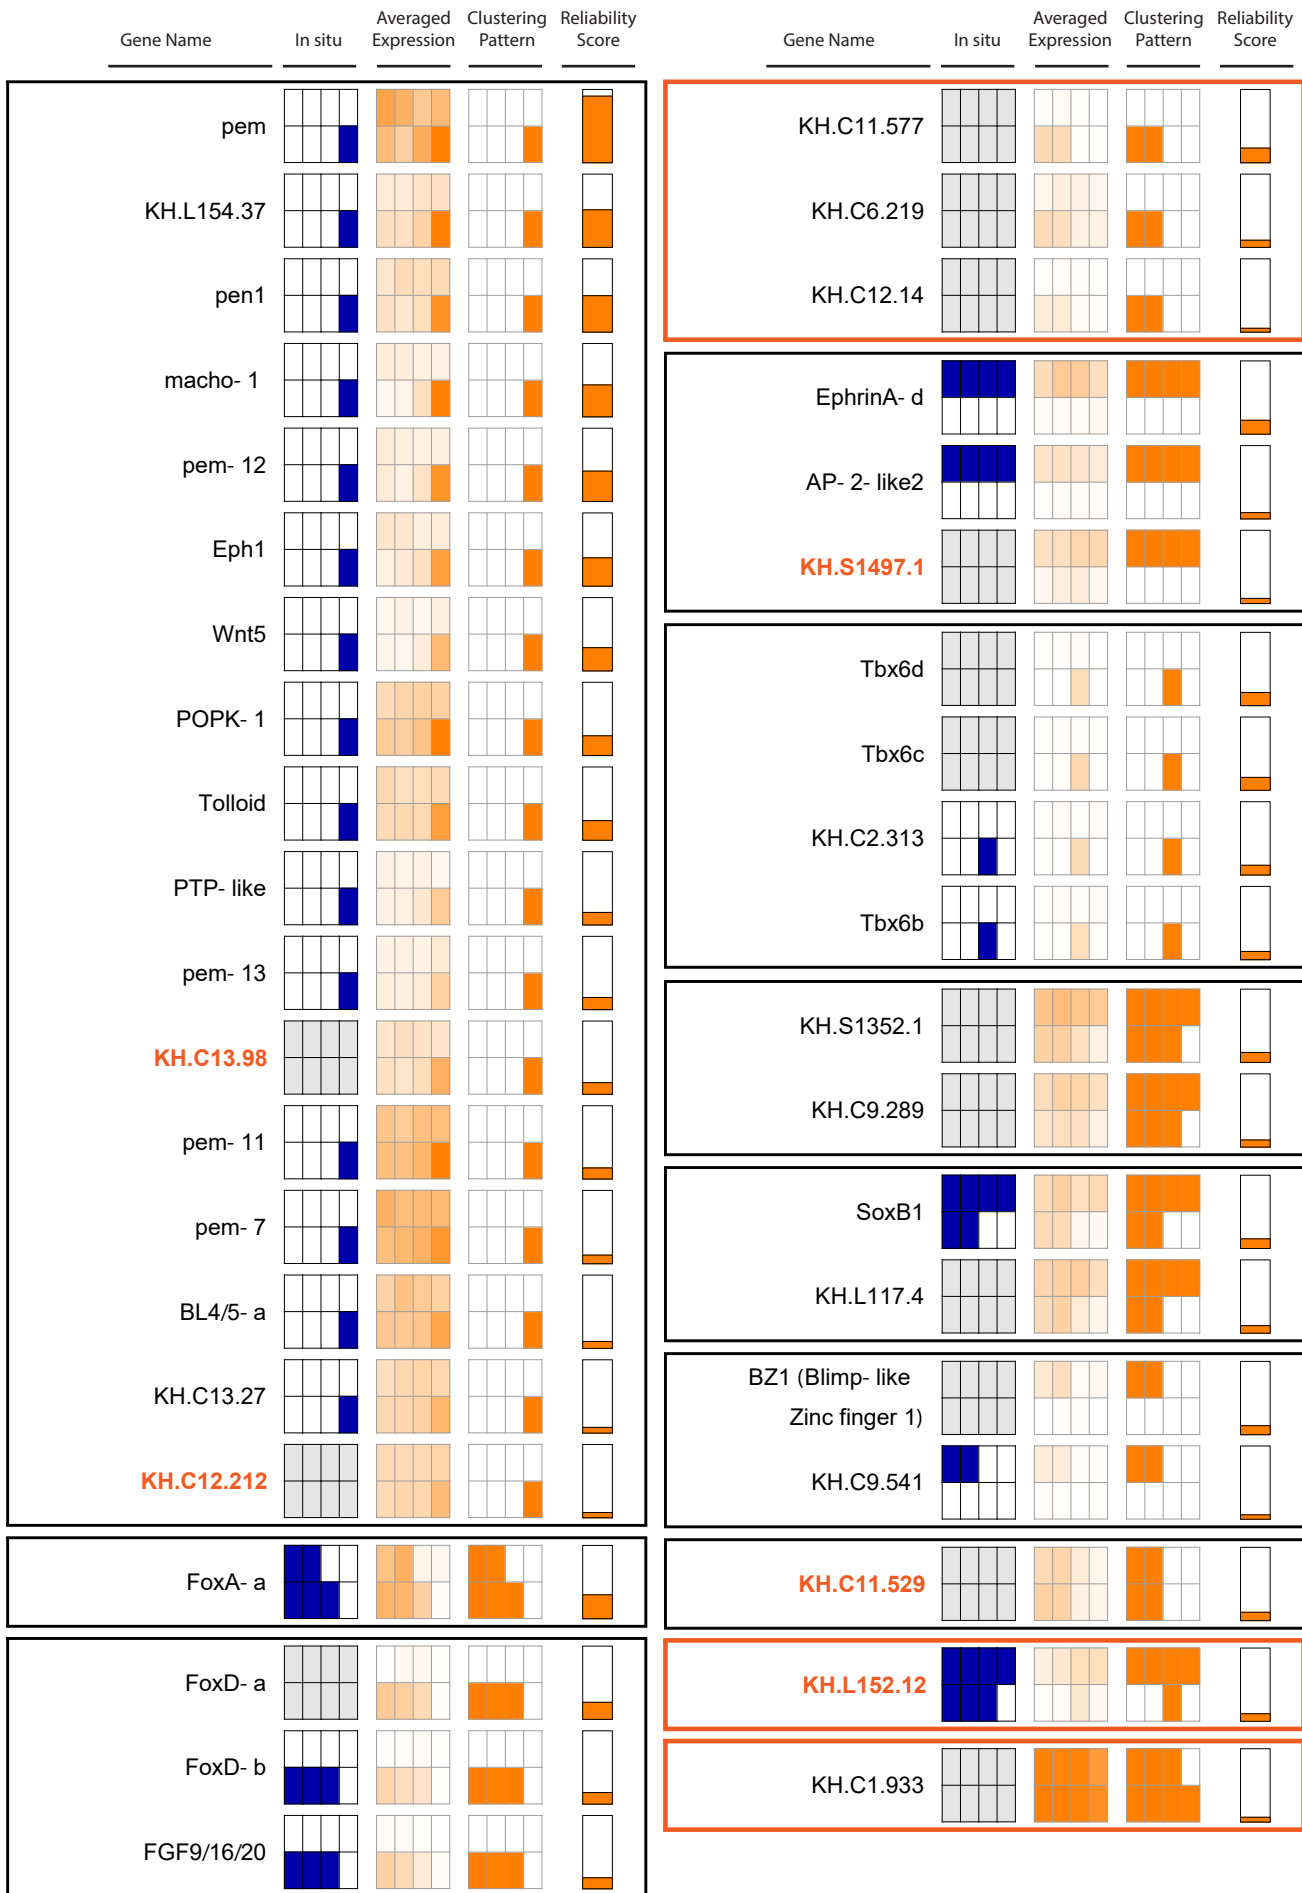

**a**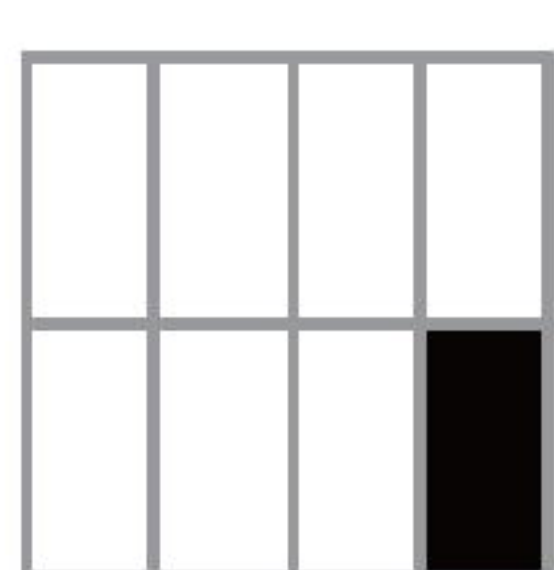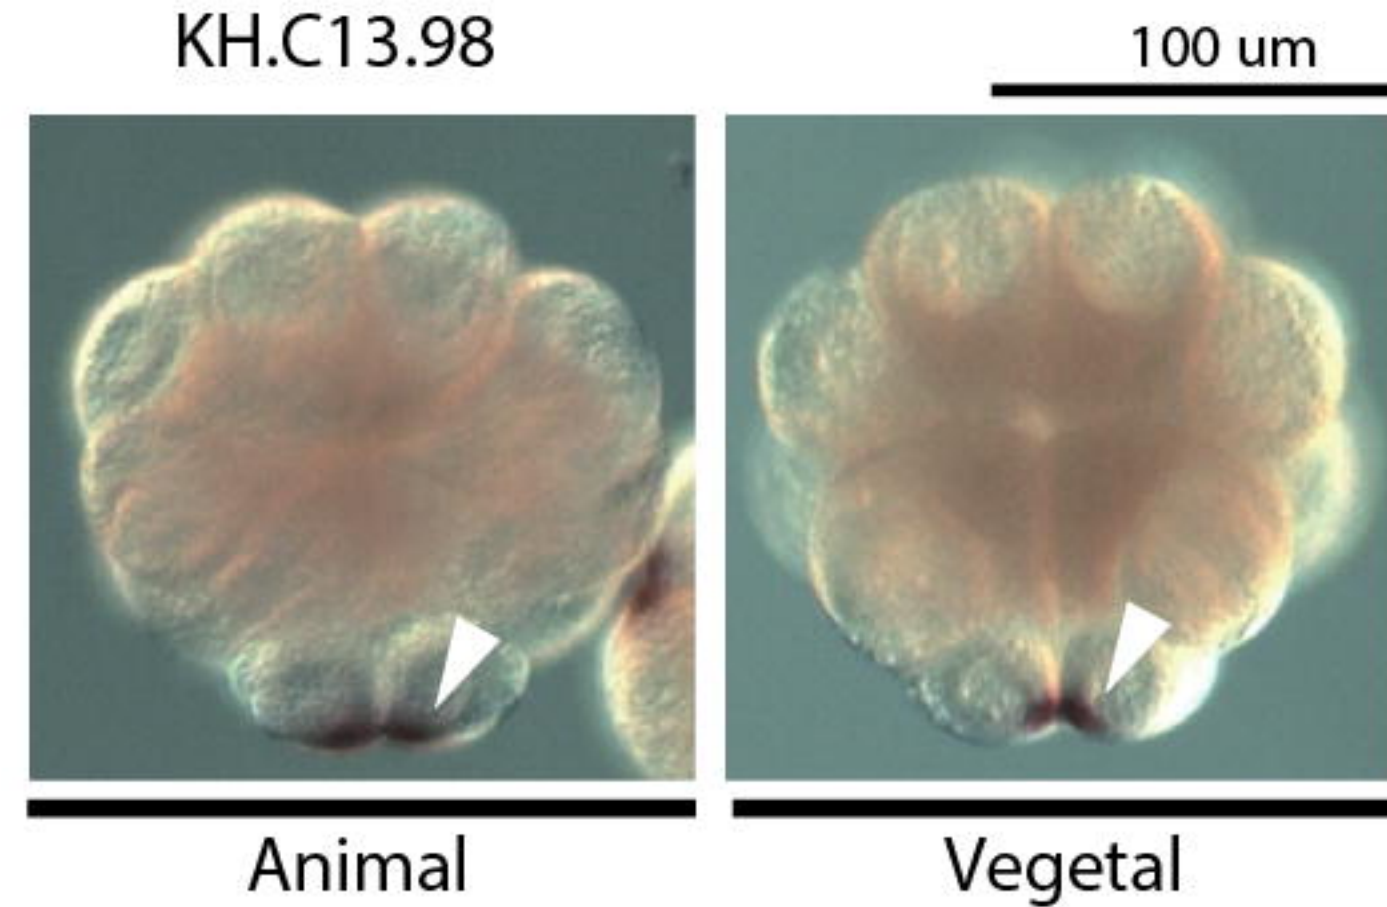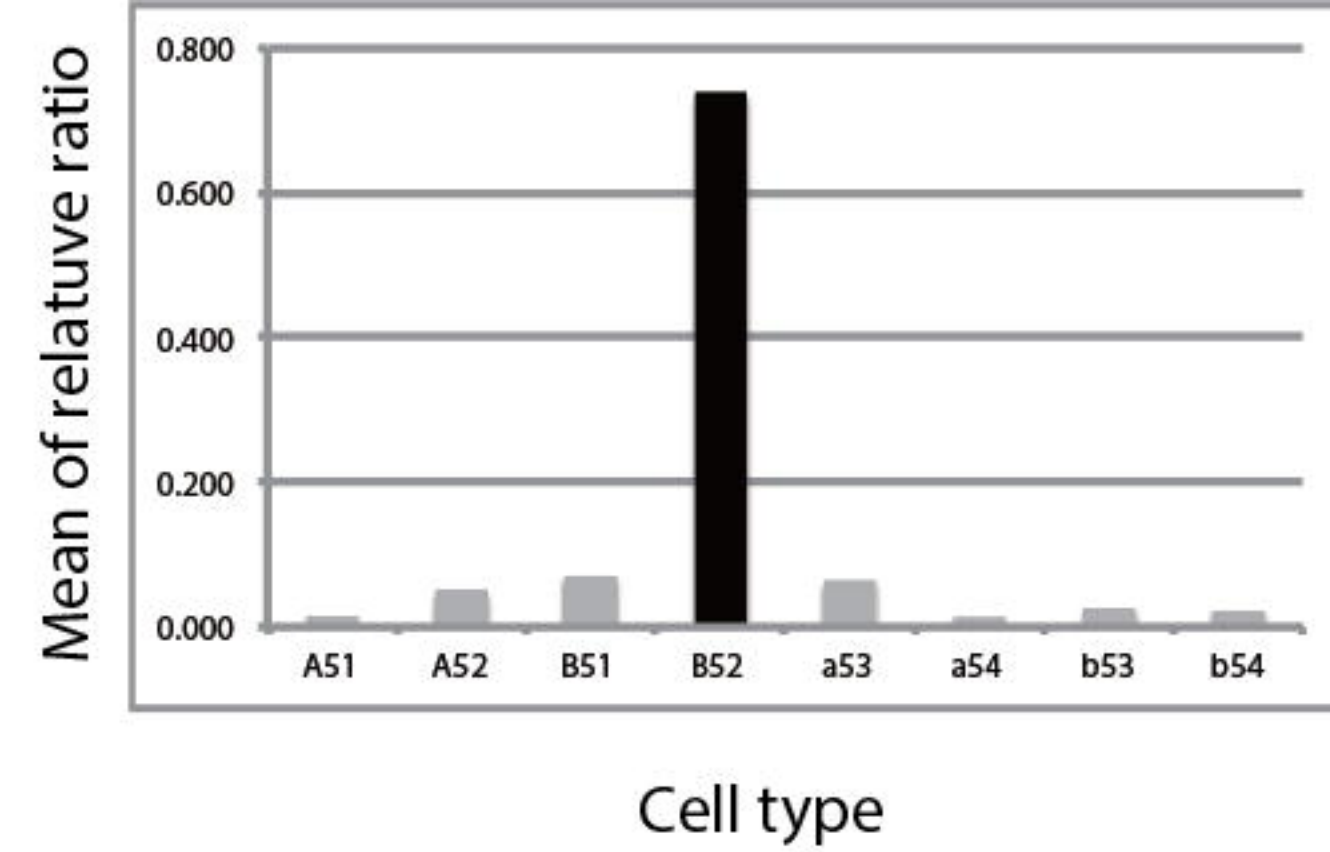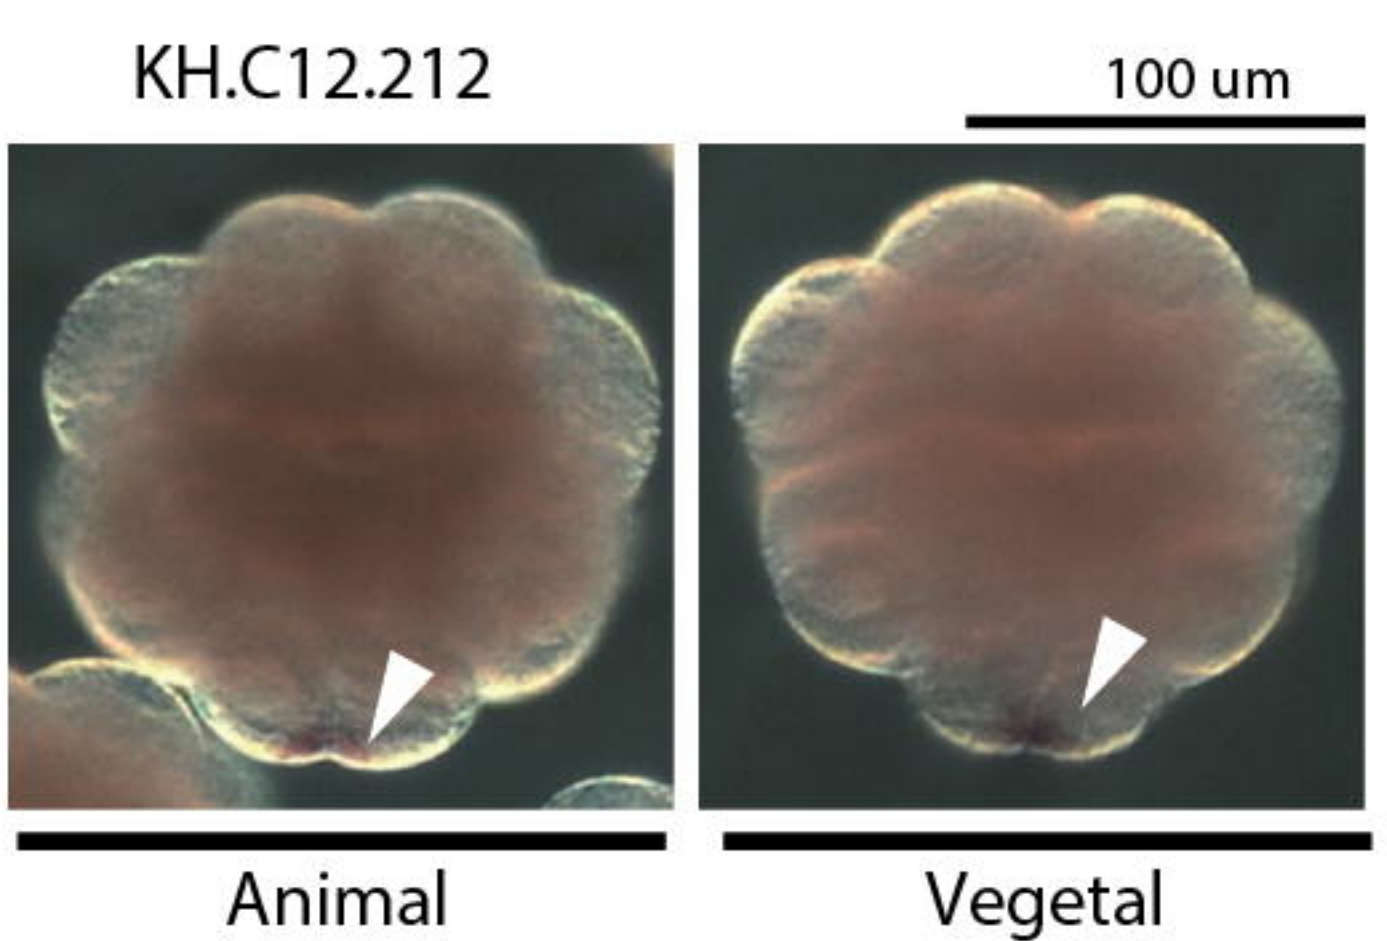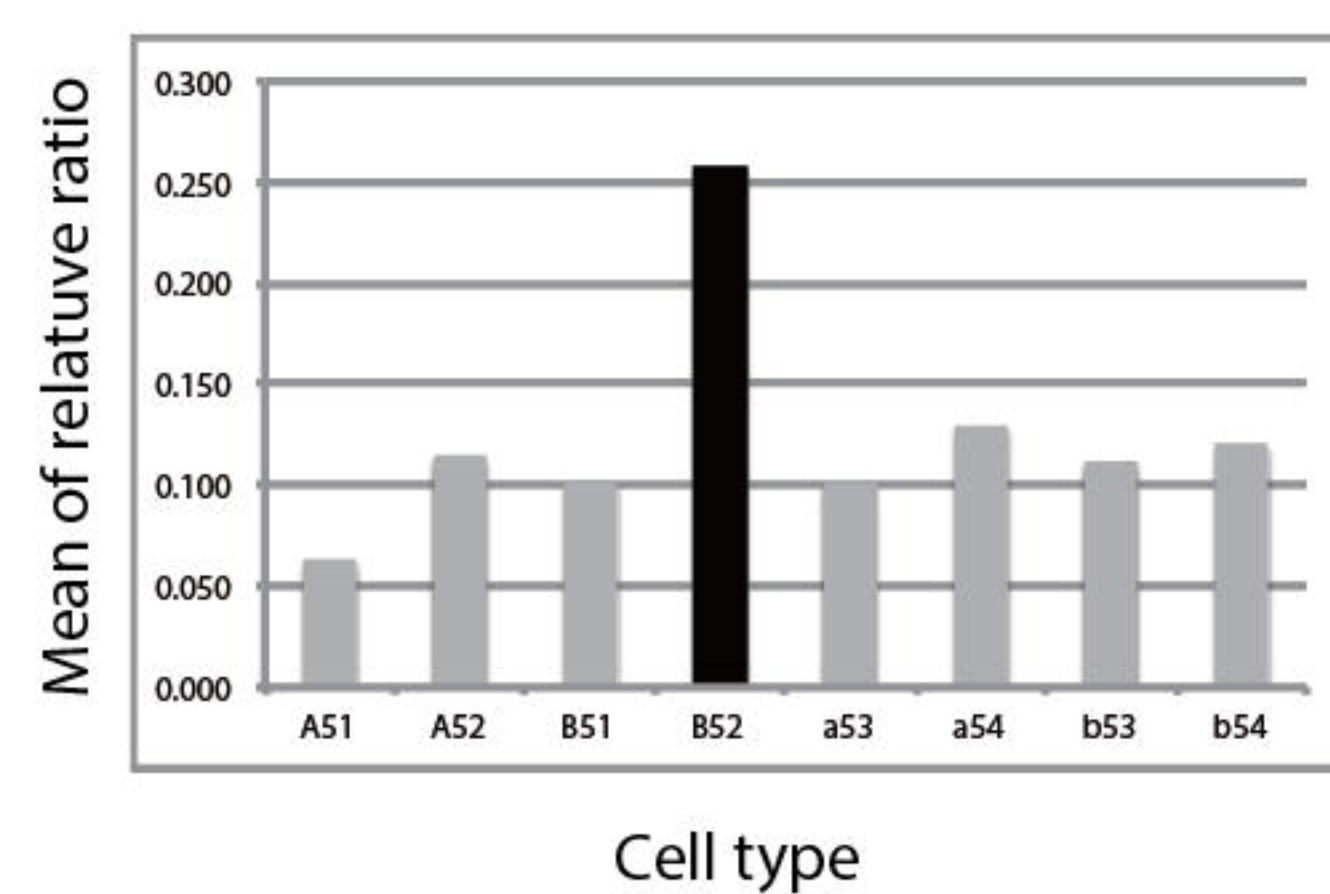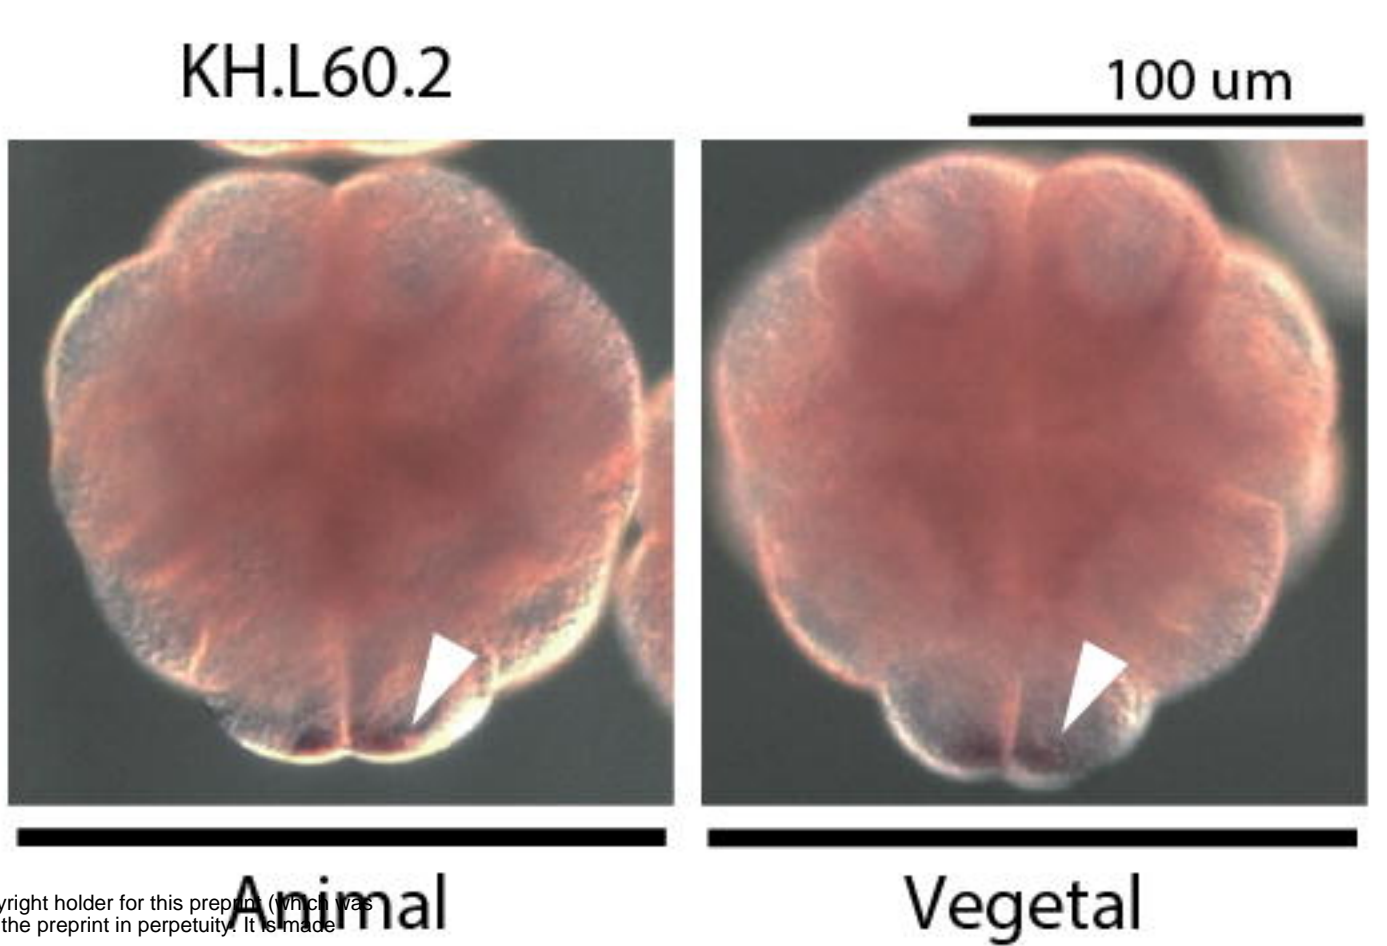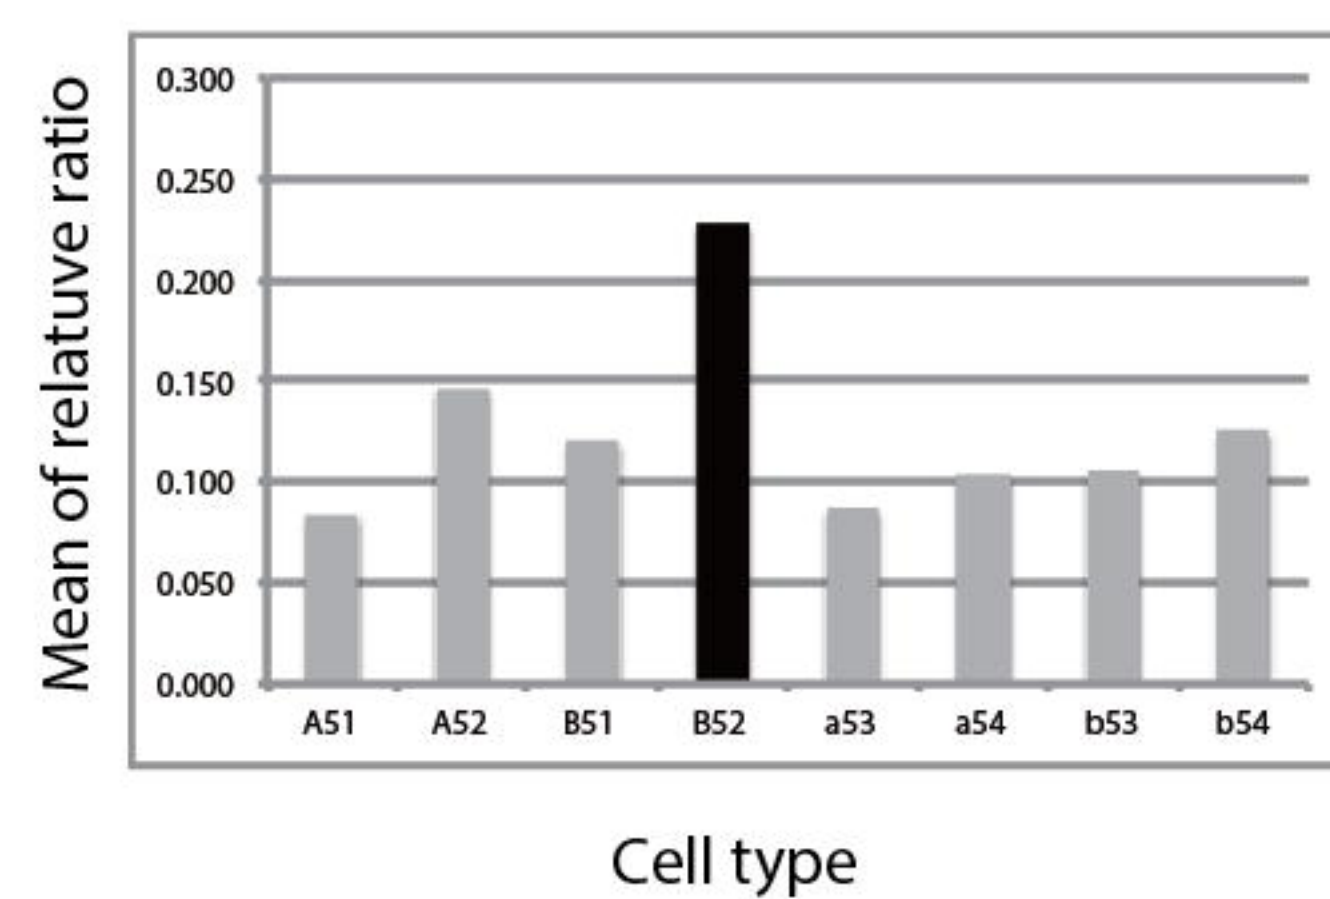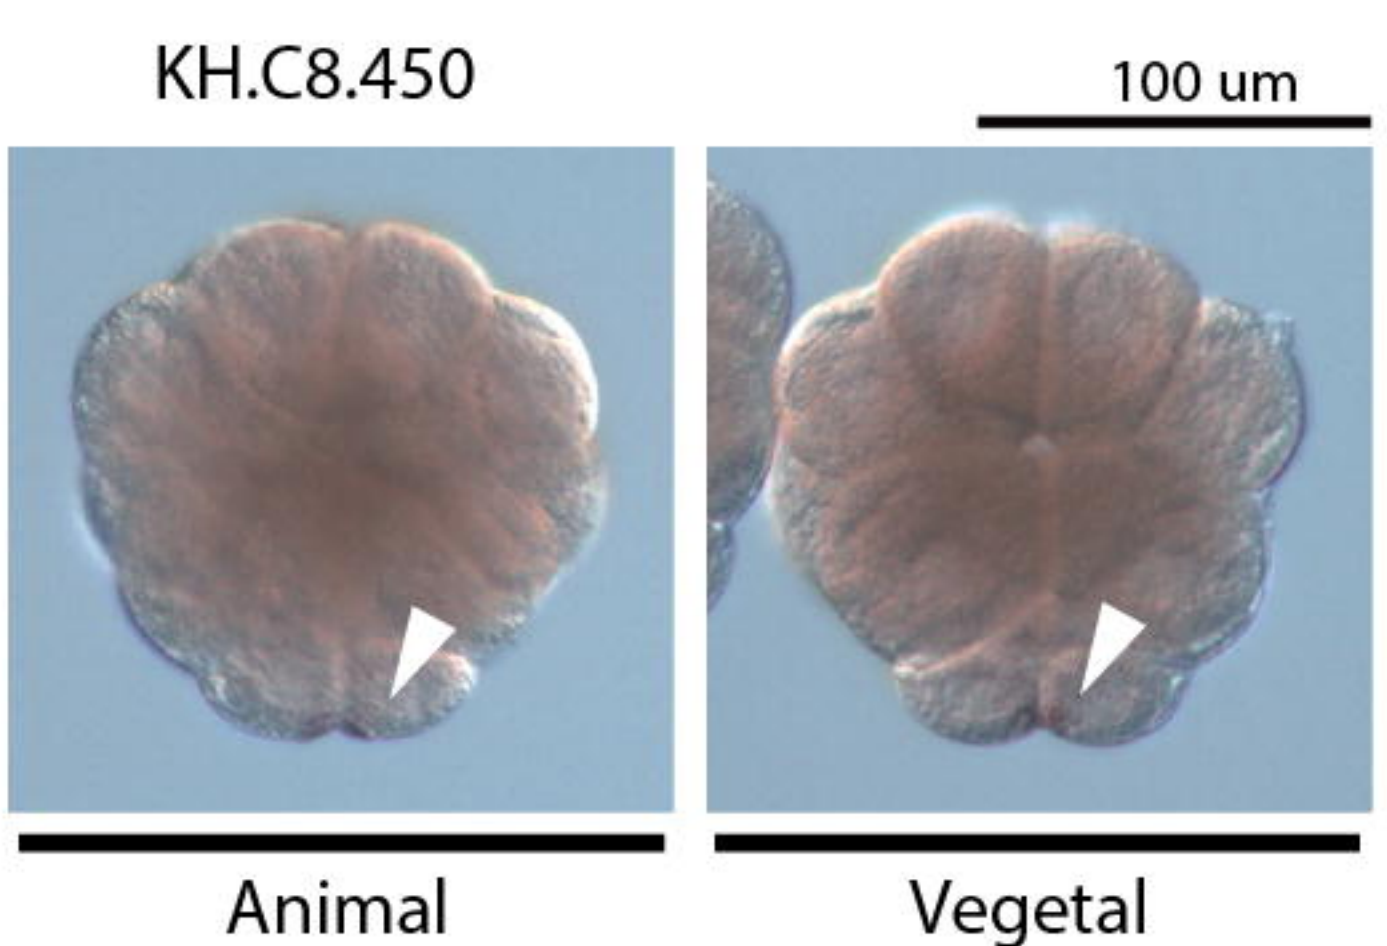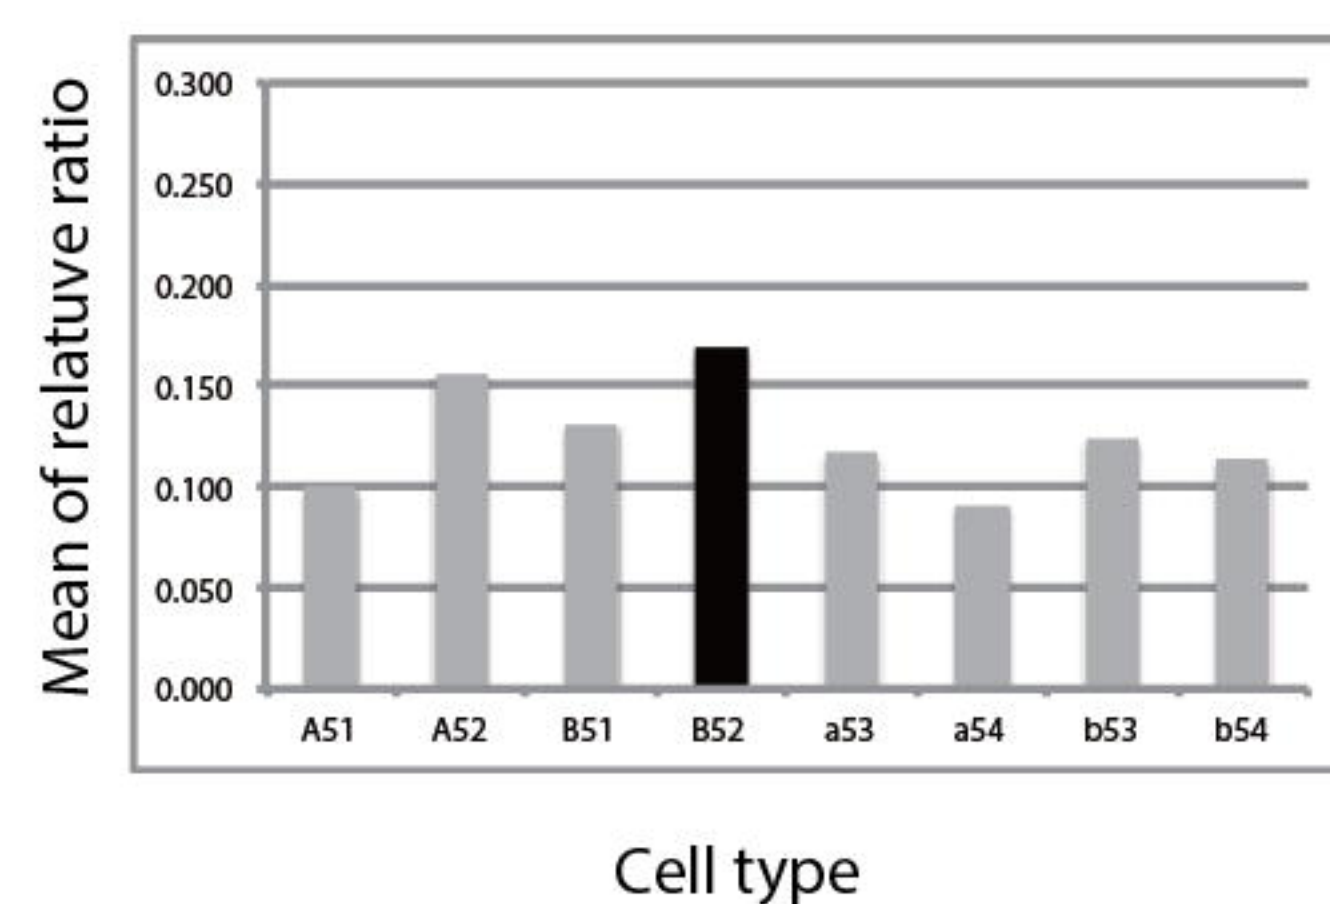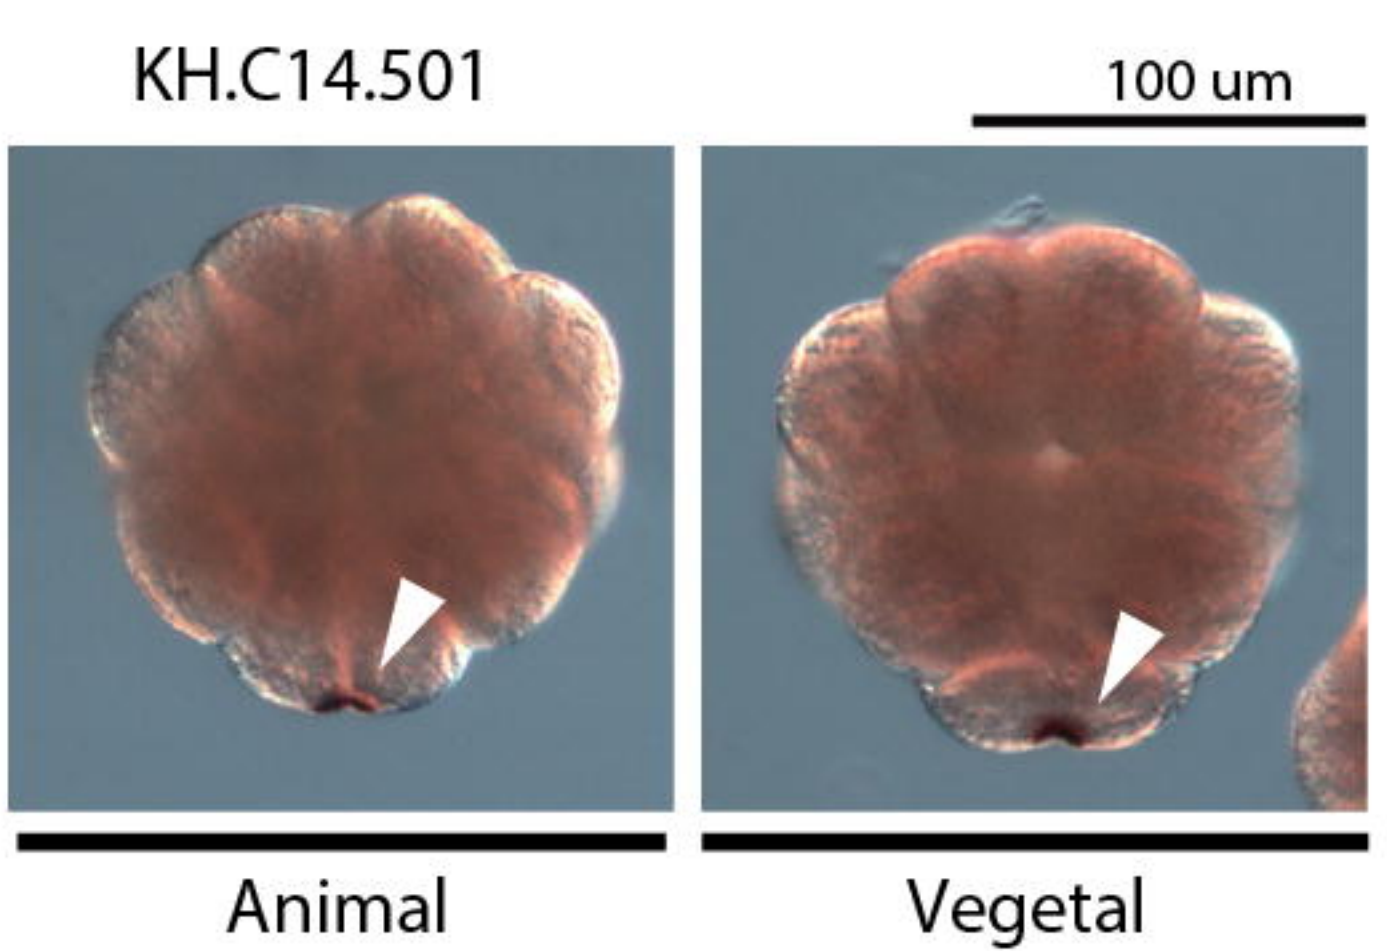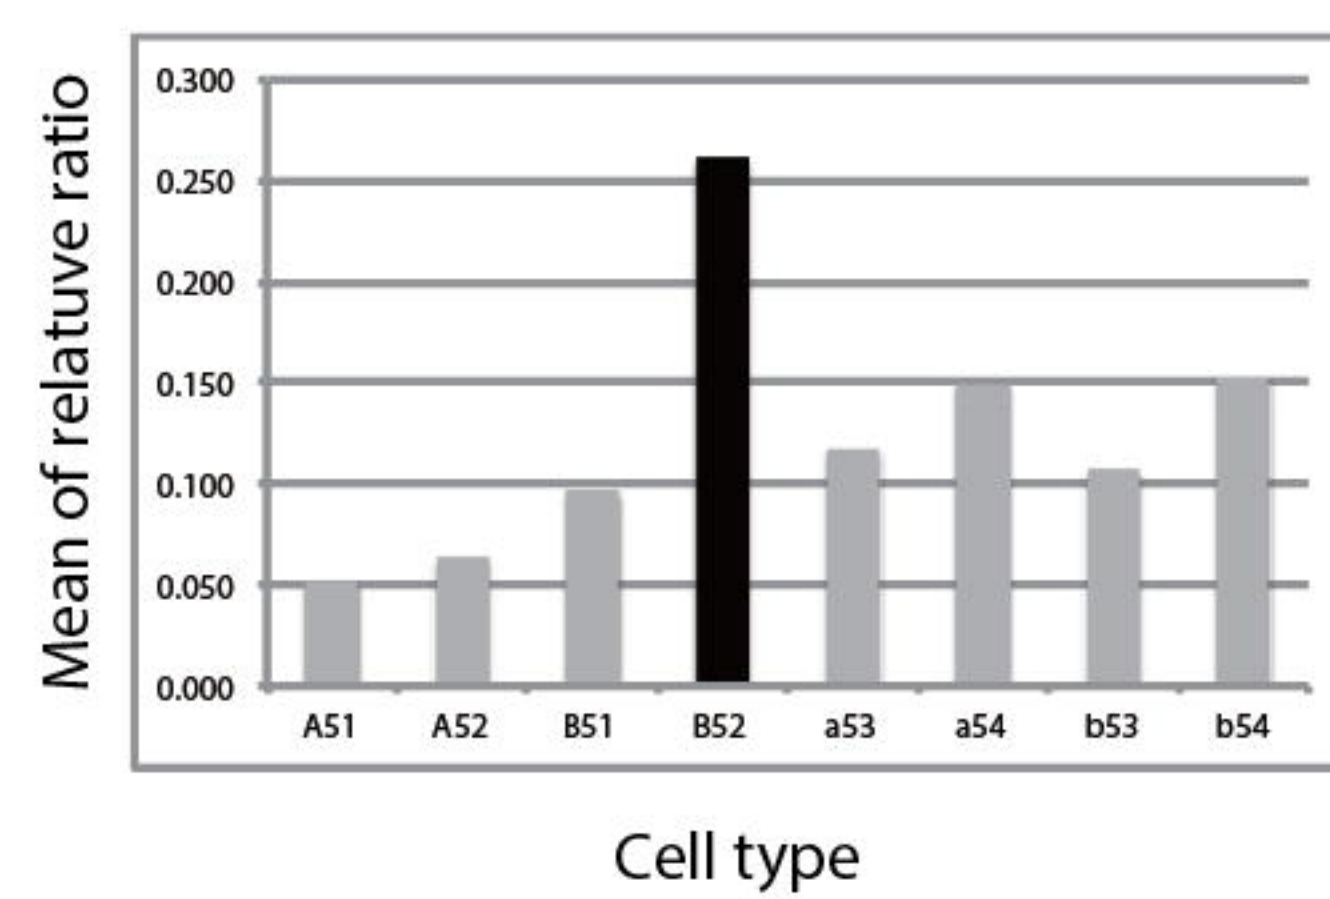**b**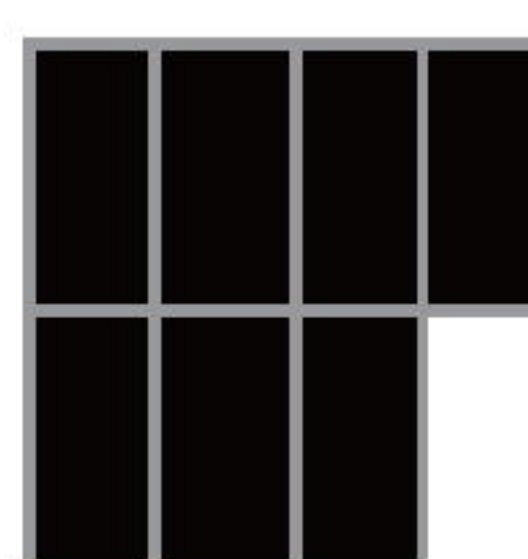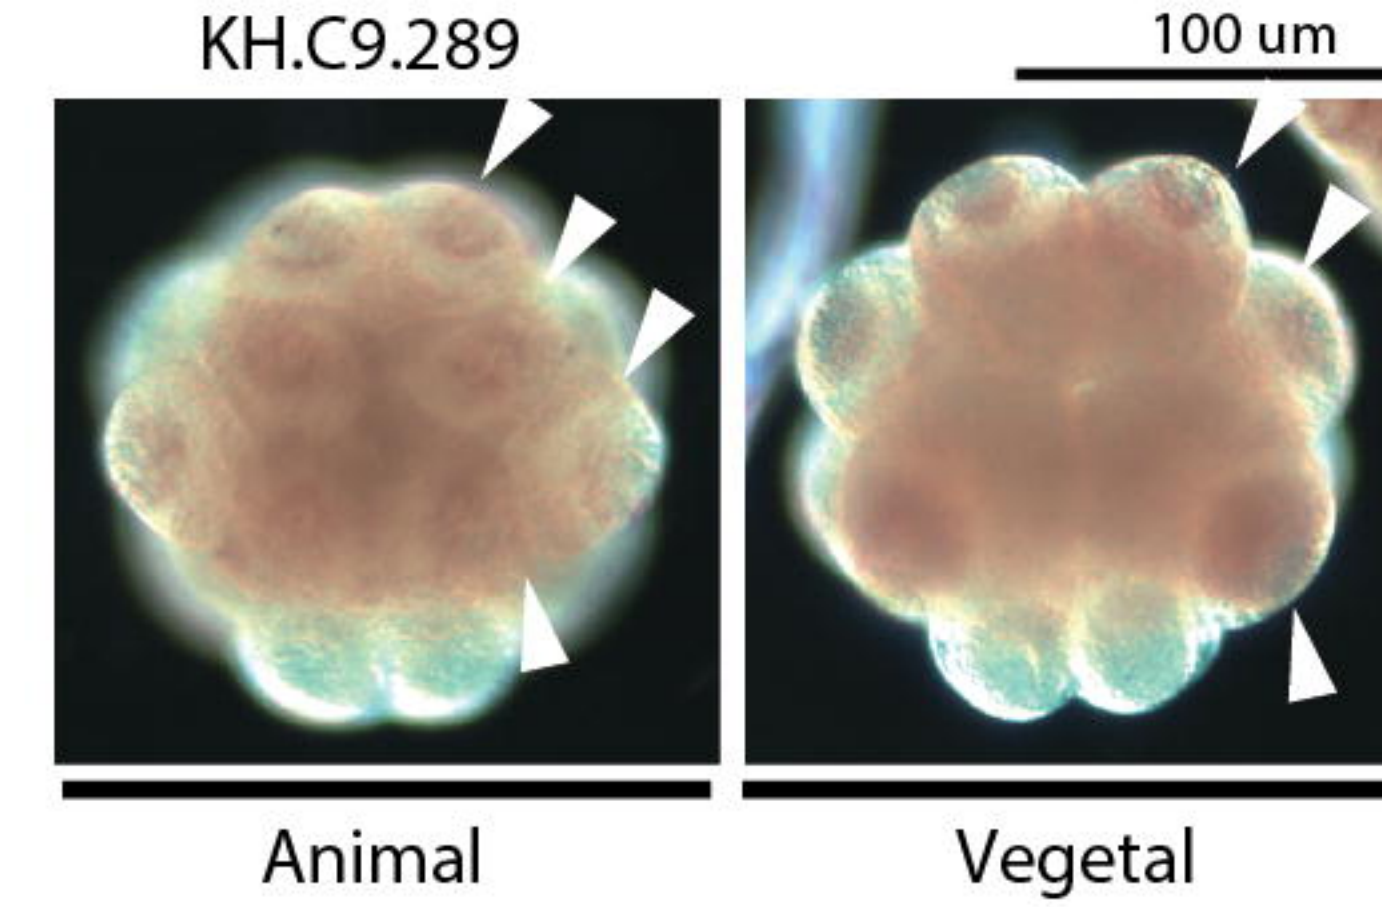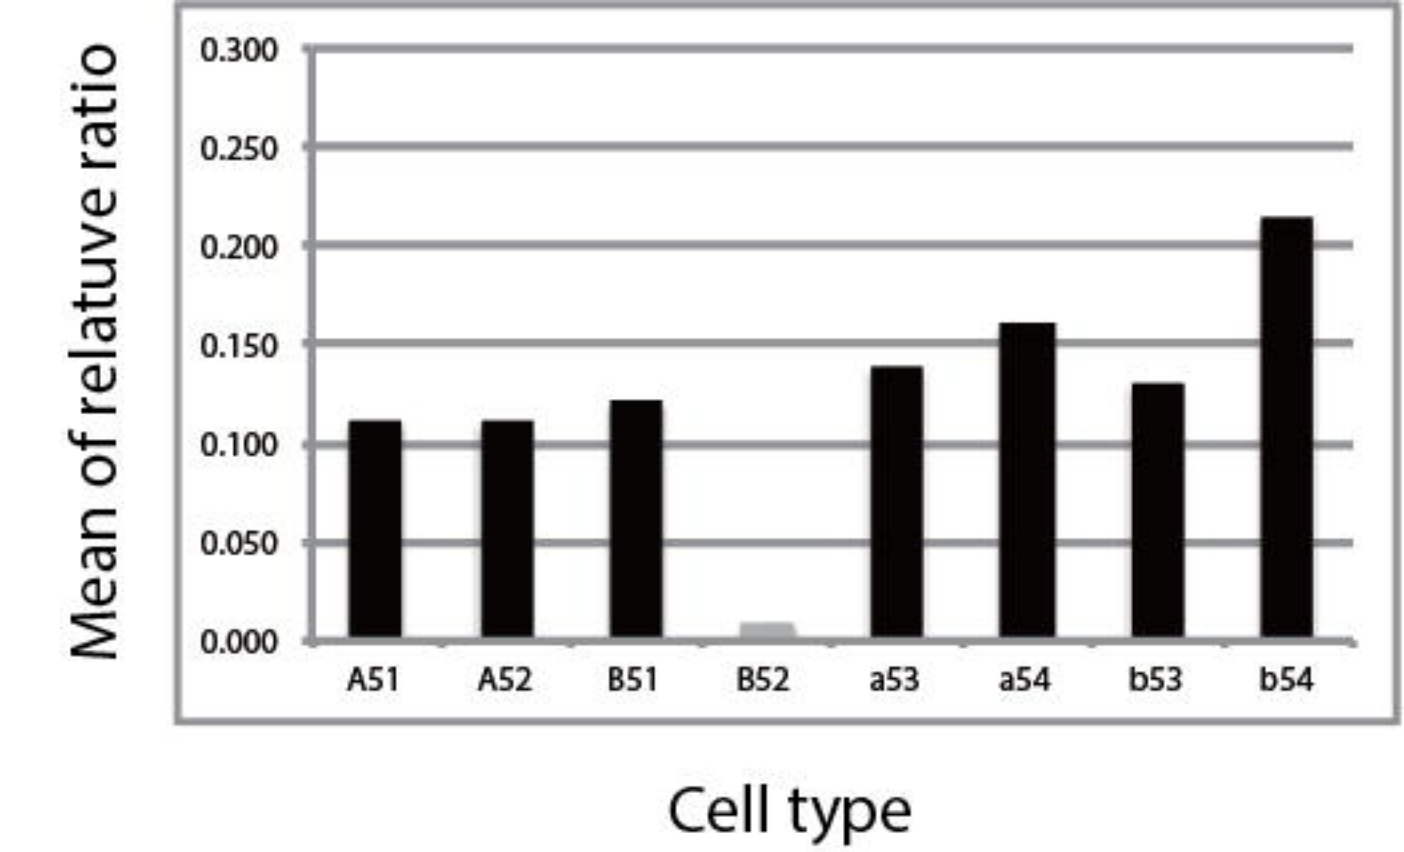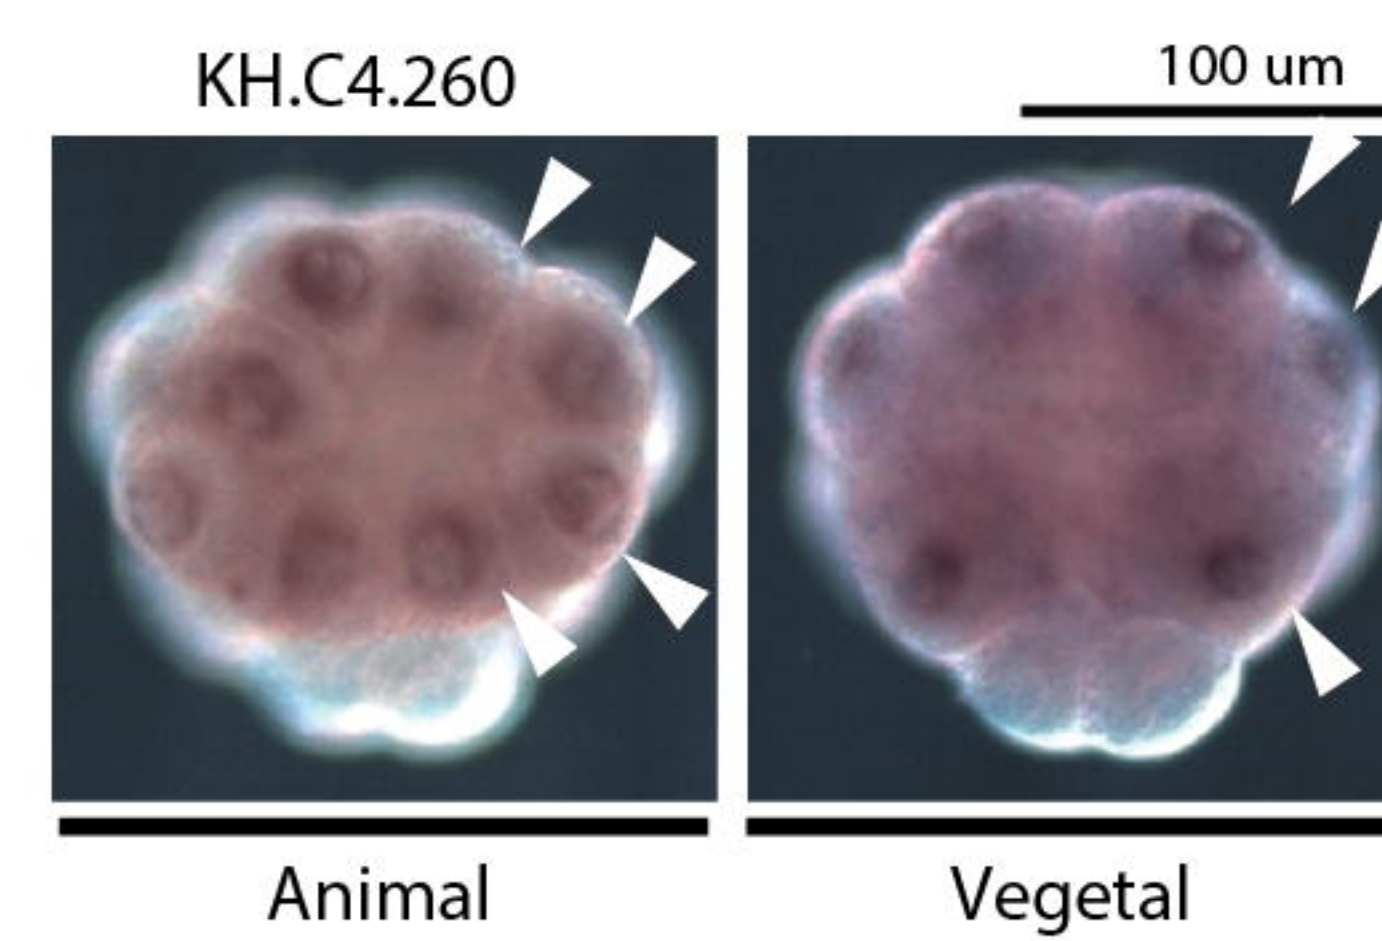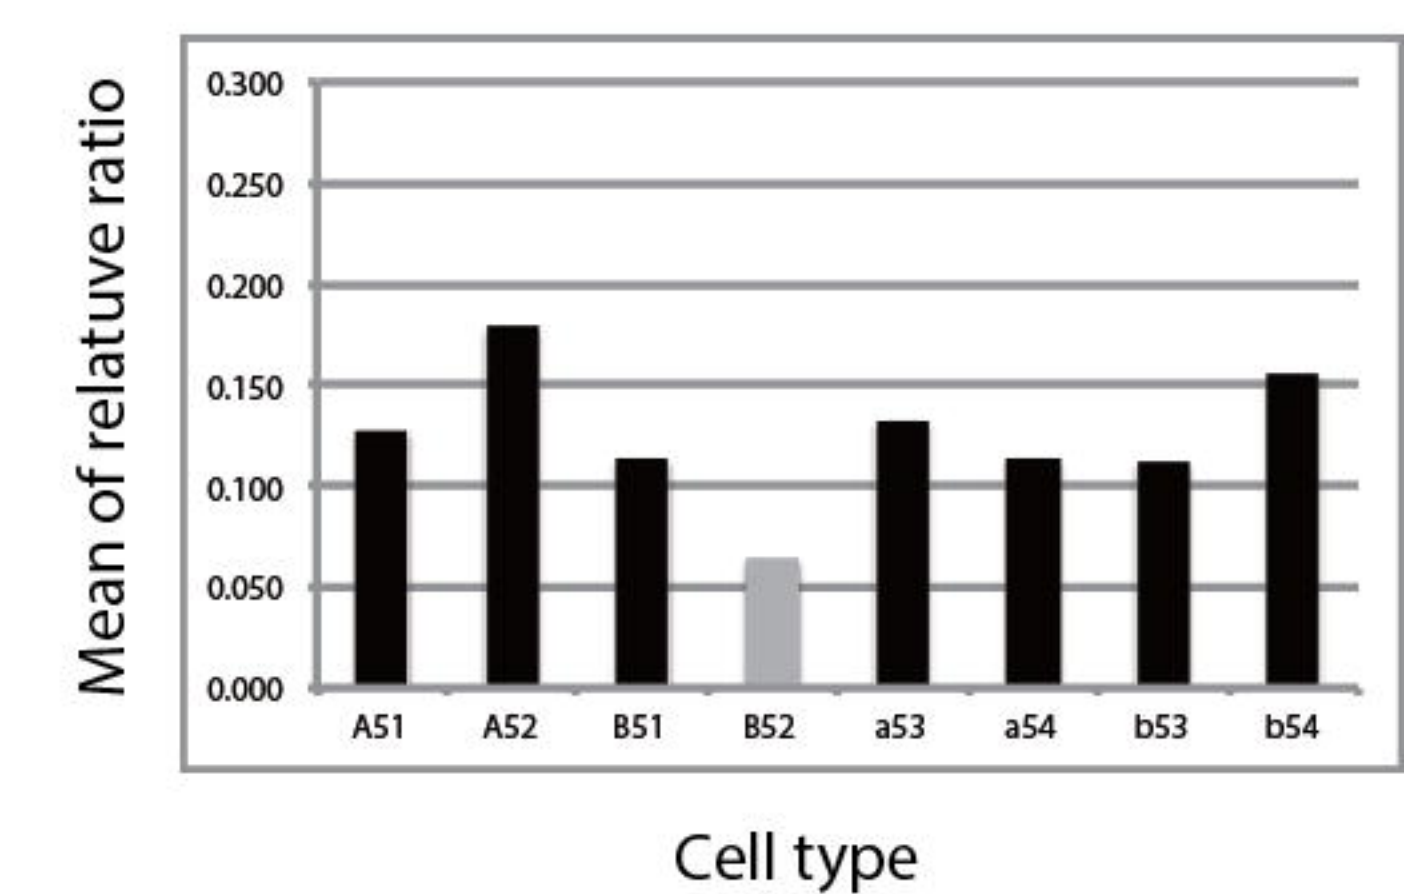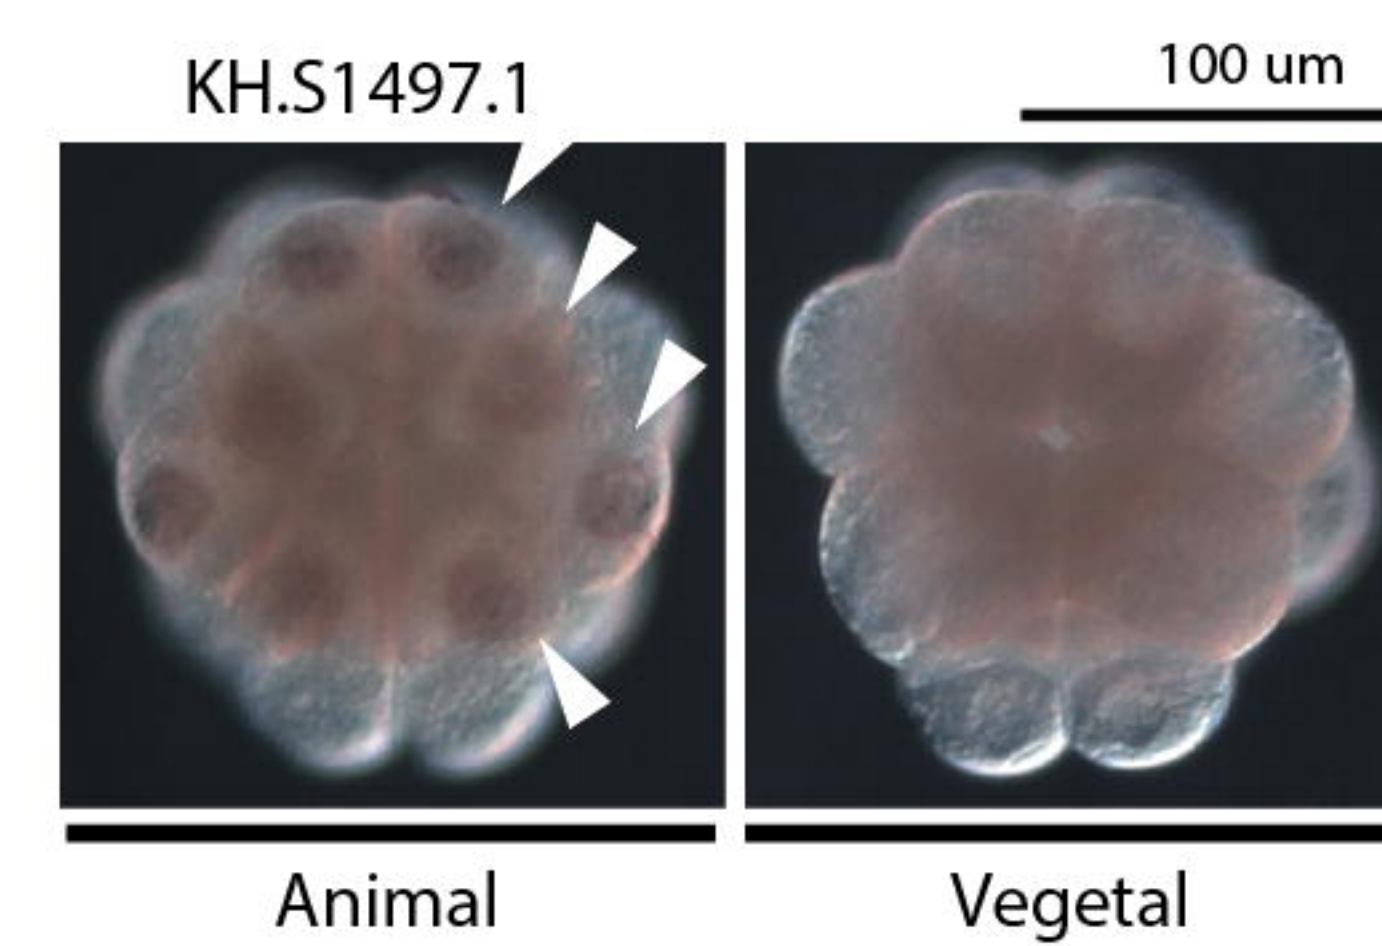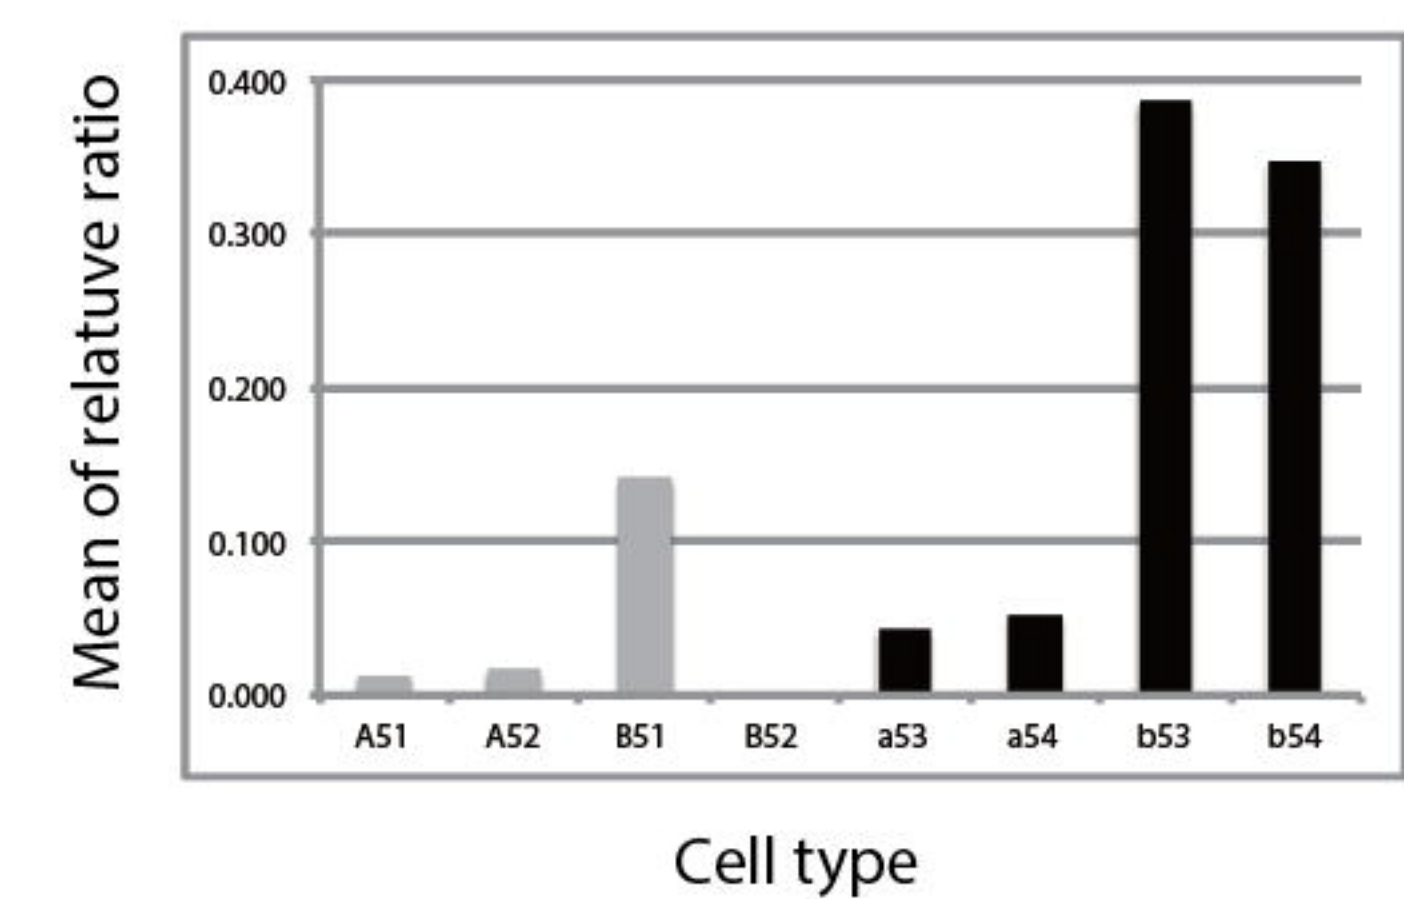**c**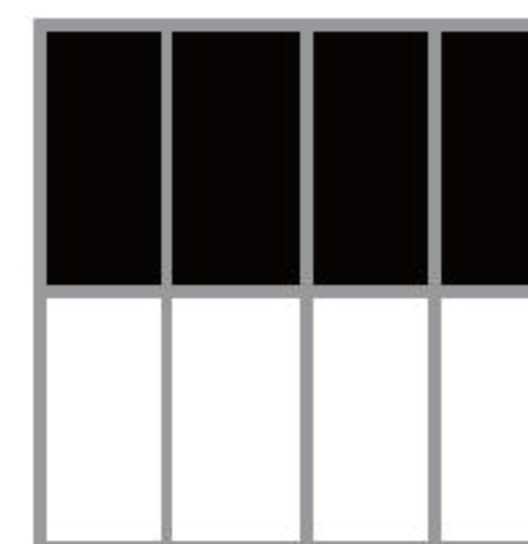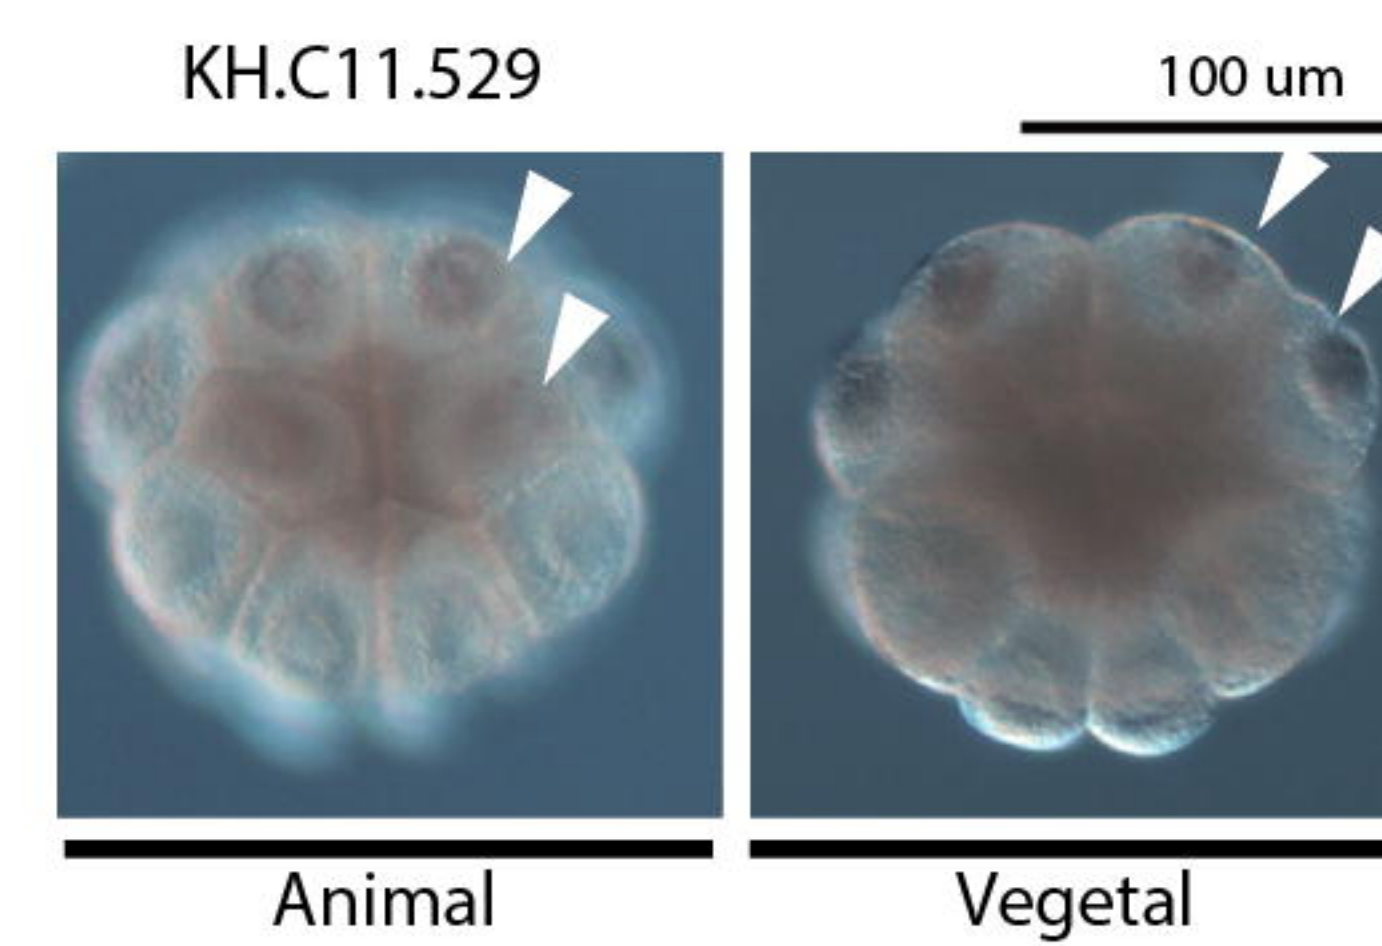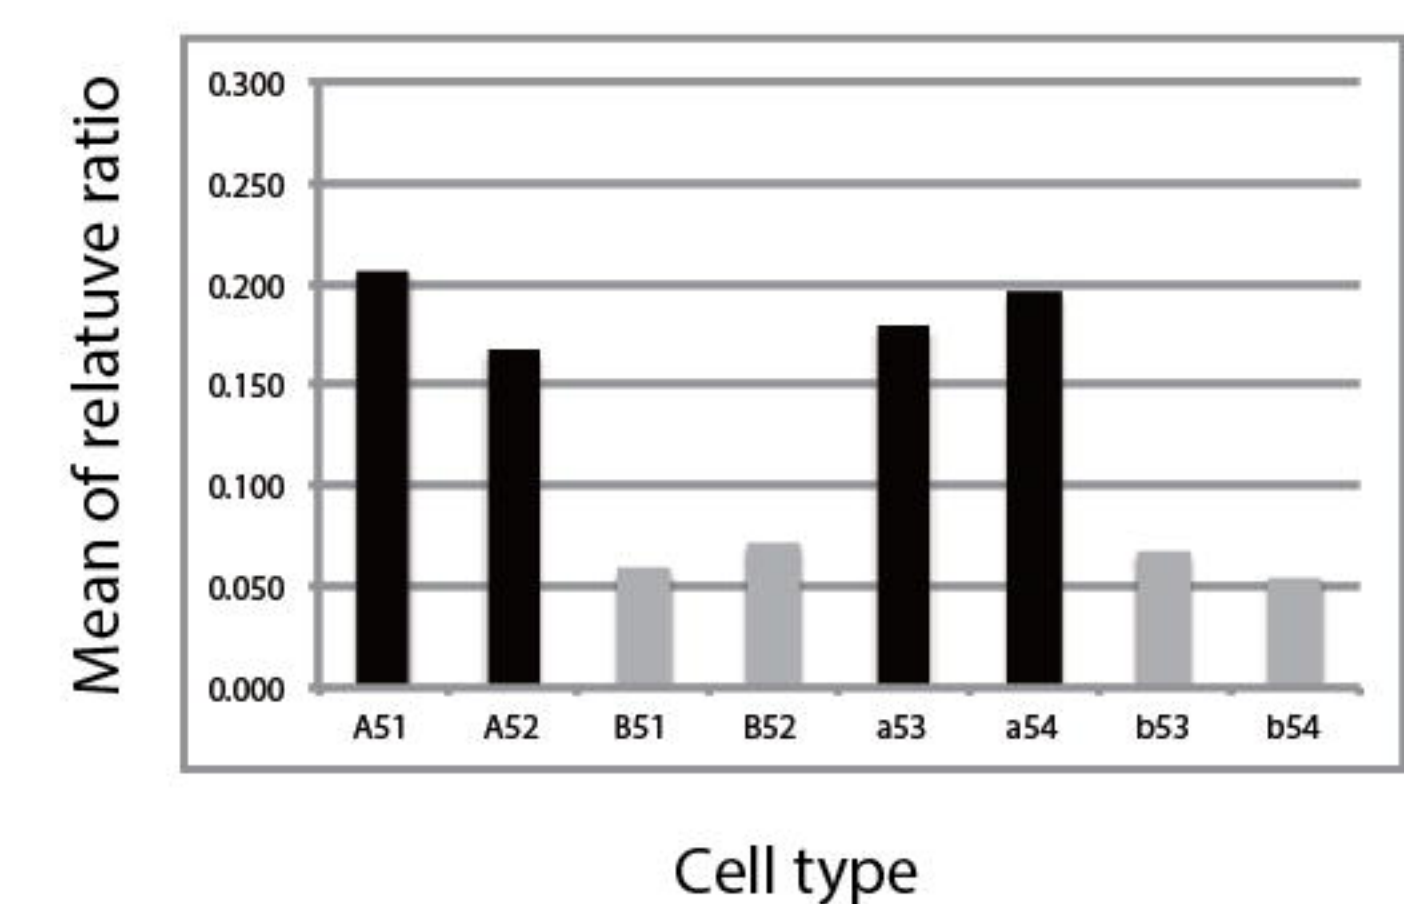**d**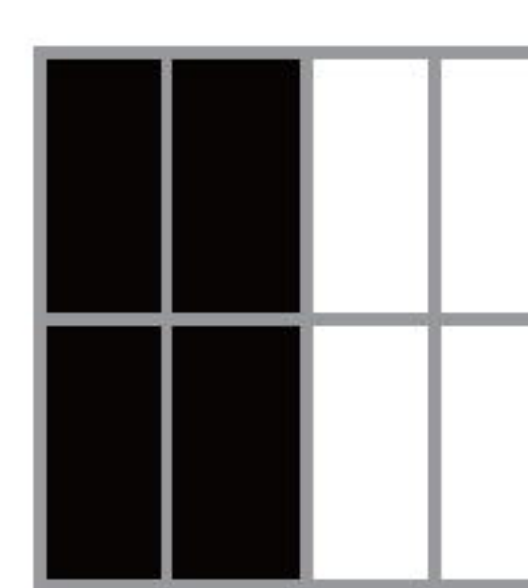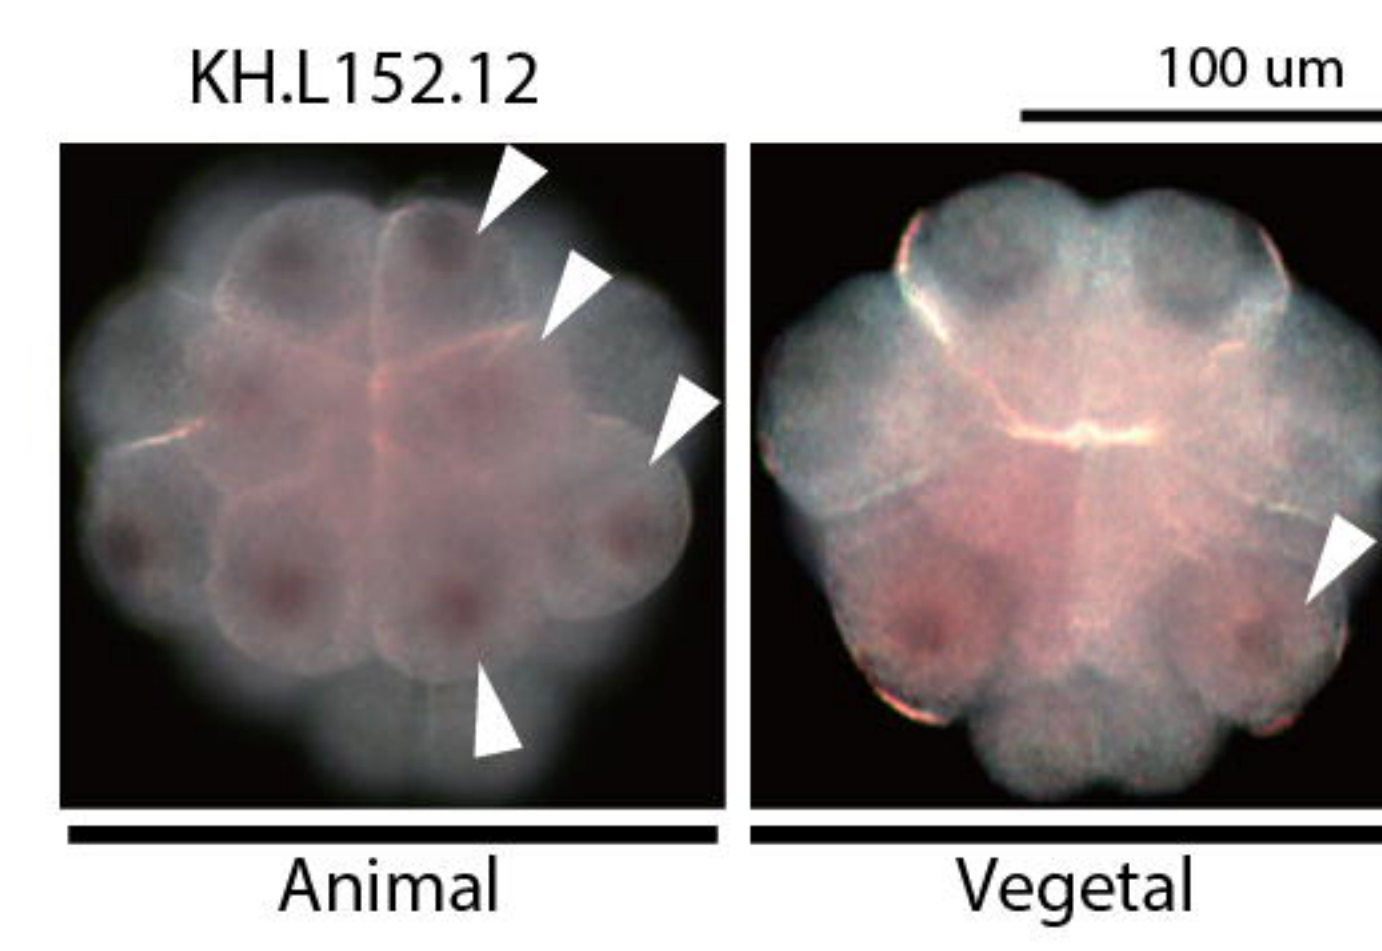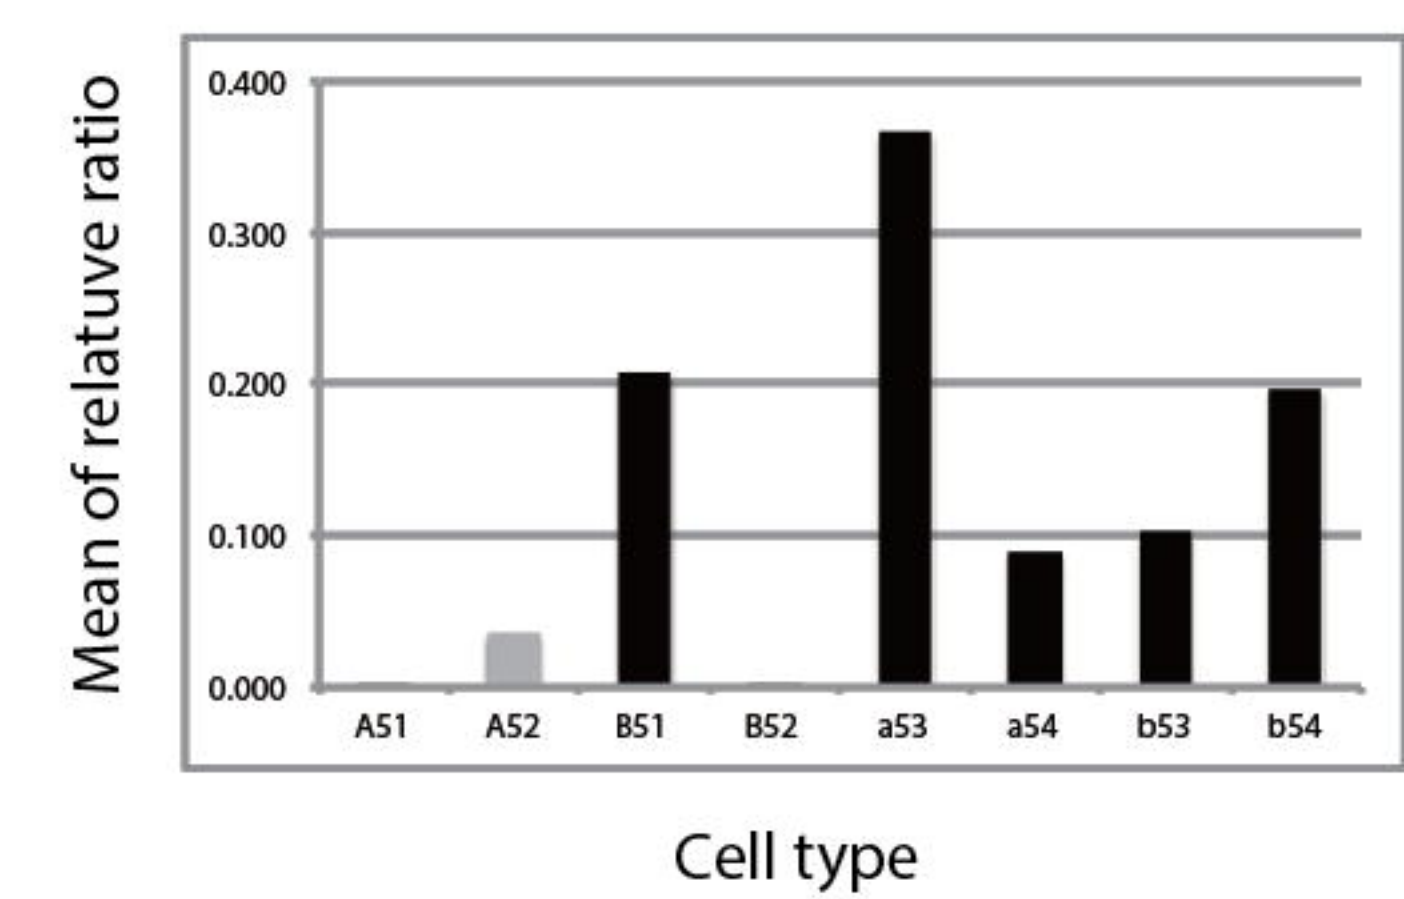**e**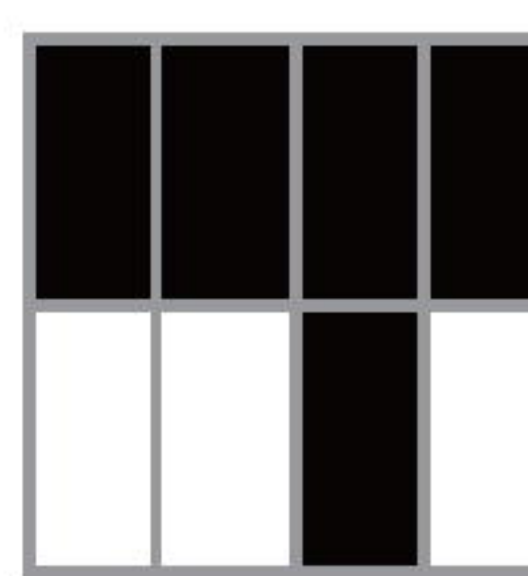

a

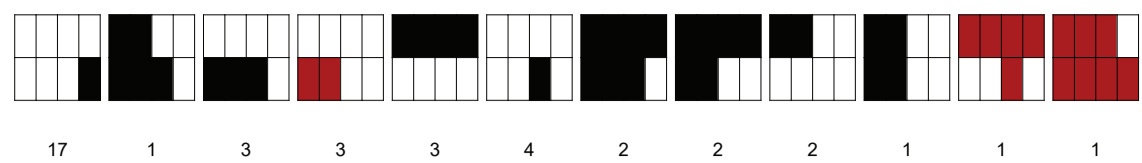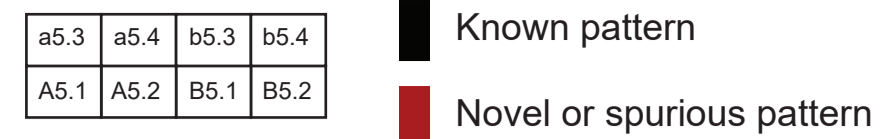

b

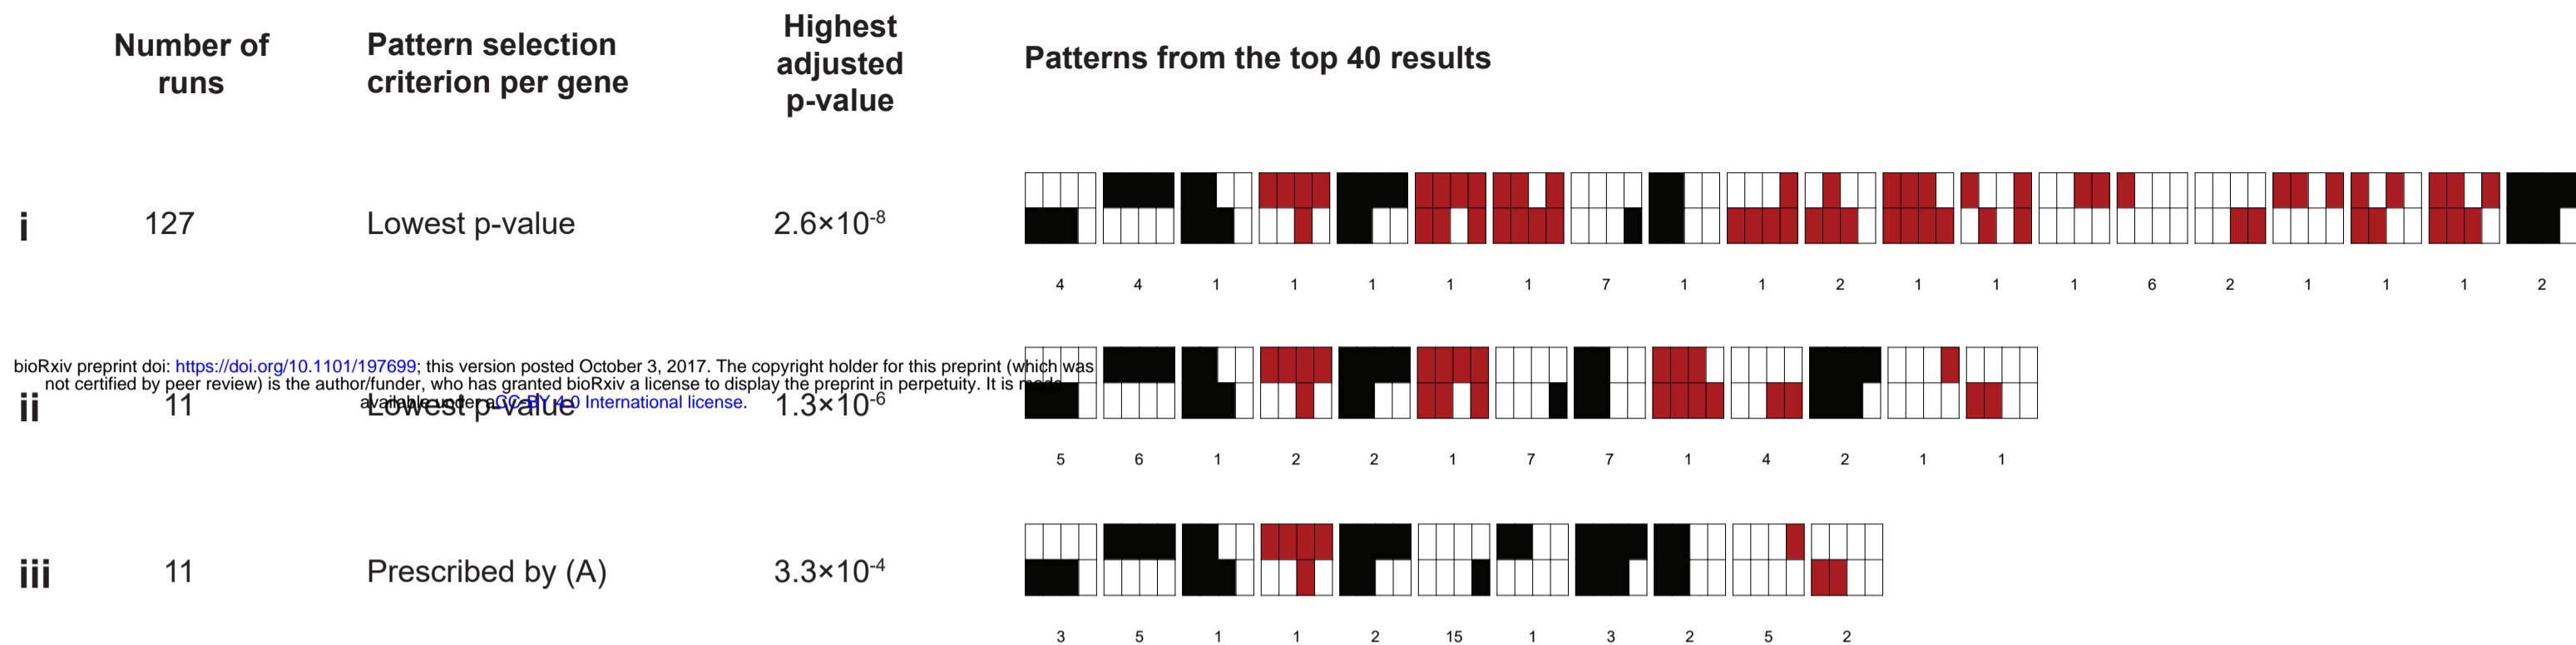

bioRxiv preprint doi: <https://doi.org/10.1101/197699>; this version posted October 3, 2017. The copyright holder for this preprint (which was not certified by peer review) is the author/funder, who has granted bioRxiv a license to display the preprint in perpetuity. It is made available under aCC-BY 4.0 International license.

c

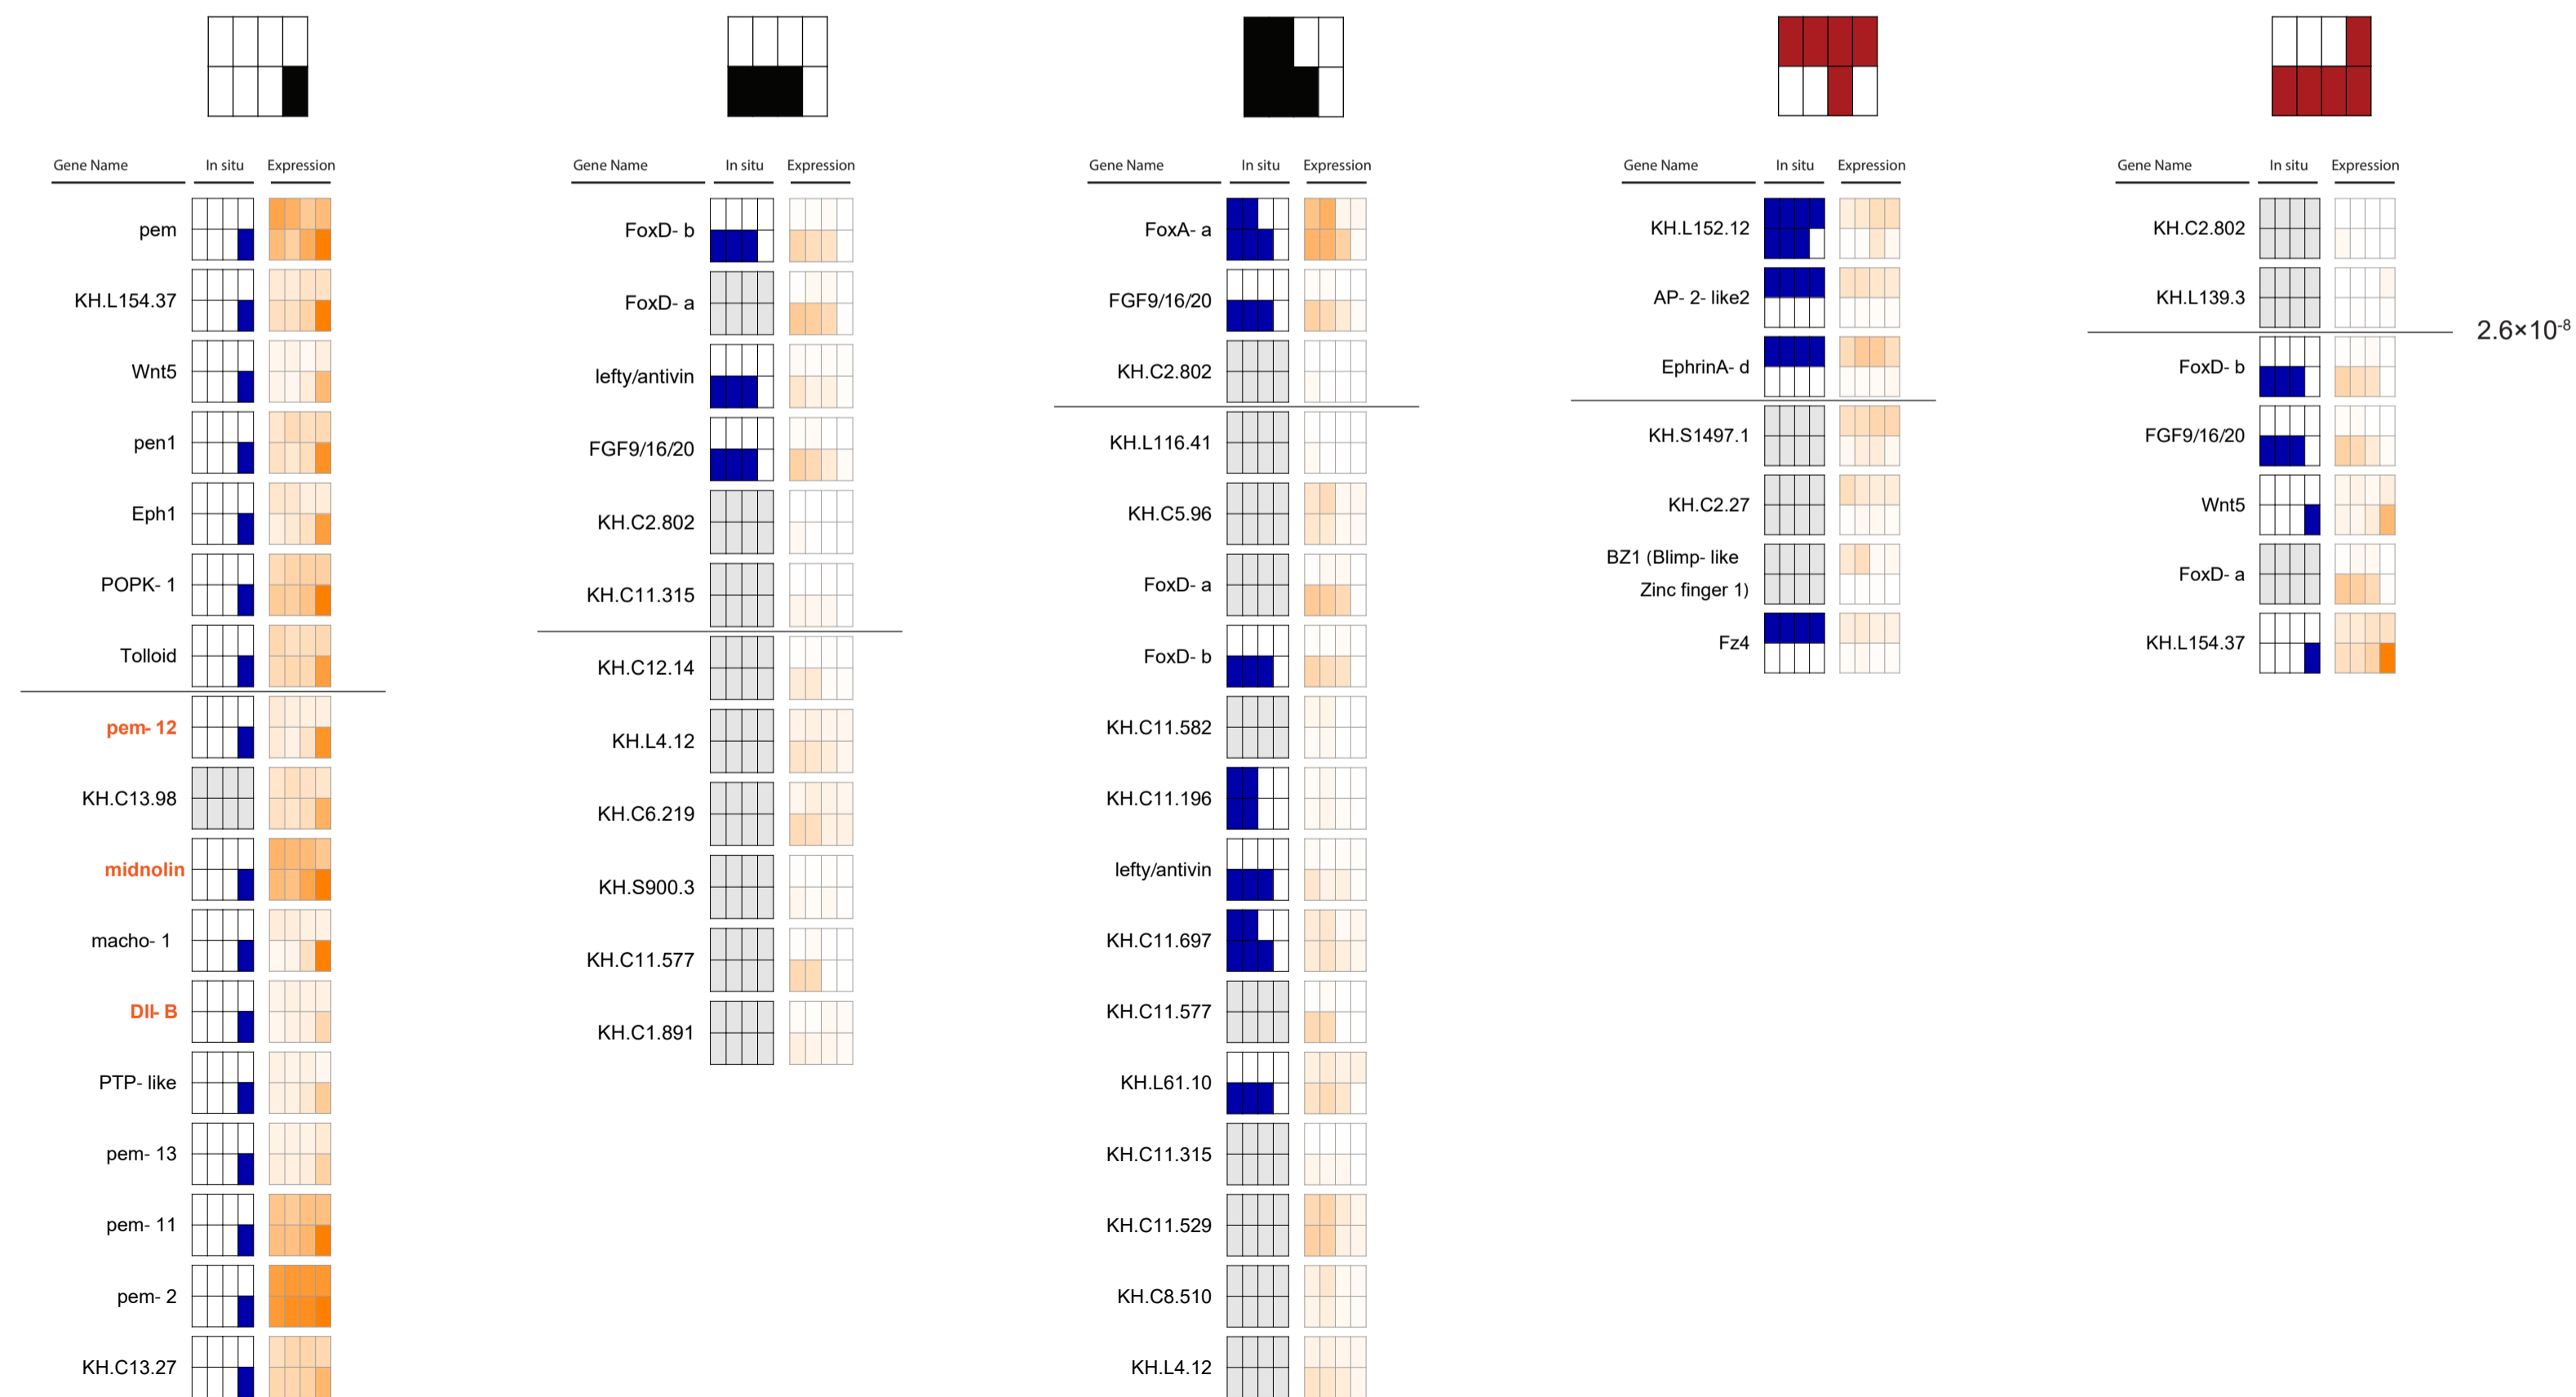

Source: https://www.biorxiv.org/content/10.1101/197699v1.full.pdf
